# Supplementary material
Source: PubMed Central journal article supplement (PMC3289047)
Supplement: NIHMS336337-supplement-1_si_001.pdf [file NIHMS336337-supplement-1_si_001.pdf]

## Supporting Information

### Diversity of Archaeosine Synthesis in Crenarchaeota

Gabriela Phillips<sup>1</sup>, Manal A. Swairjo<sup>2</sup>, Kirk W. Gaston<sup>3</sup>, Marc Bailly<sup>1§</sup>, Dirk Iwata-Reuyl<sup>4</sup>, Patrick A. Limbach<sup>3</sup>, and Valérie de Crécy-Lagard<sup>1\*</sup>

#### Content of Supporting Information

1. Methods
2. Supplemental Data 1
3. Supplemental Data 2
4. Supplemental Figures
5. Supplemental References

#### 1. Methods

##### *Media.*

*Escherichia coli* derivatives were routinely grown at 37°C in LB (BD Diagnostic System) supplemented with 0.2% glycerol as a carbon source. Growth media were solidified with 15 g/L agar (BD Diagnostic System) for the preparation of plates. Ampicillin (Amp<sup>r</sup>, 100 µg/mL), Thymidine (dT, 300 µM), Kanamycin (Kan<sup>r</sup>, 50 µg/mL) and L-arabinose (0.2%) were added when needed. Transformations of *E. coli* were performed following standard procedures (1).

##### **Growth of *Haloquadratum walsbyi*.**

*H. waslbyi* C23 (2) was grown at 37°C static in defined media (DBCM2) (3) containing 200 g NaCl, 29.1 g MgSO<sub>4</sub>•7H<sub>2</sub>O, 25g MgCl<sub>2</sub>•6H<sub>2</sub>O, 5.8 g KCl, 5 mM, 5.0 mM NH<sub>4</sub>Cl, 1mM K<sub>2</sub>HPO<sub>4</sub> pH 7.5, 0.25% HCl, 0.015 g FeCl<sub>2</sub>•4H<sub>2</sub>O, 0.19 mg CoCl<sub>2</sub>•6H<sub>2</sub>O, 0.1 mg MnCl<sub>2</sub>•4H<sub>2</sub>O, 0.07 mg ZnCl<sub>2</sub>, 0.006 mg H<sub>3</sub>BO<sub>3</sub>, 0.036 Na<sub>2</sub>MoO<sub>4</sub>•2H<sub>2</sub>O, 0.024 mg NiCl<sub>2</sub>•6H<sub>2</sub>O, 0.002 mg CuCl<sub>2</sub>•2H<sub>2</sub>O, 0.04 mg 4-aminobenzoate, 0.003 mg biotin, 0.09 mg nicotinic acid, 0.05 mg calcium pantothenate, 0.15 mg pyridoxamine hydrochloride, 0.09 mg thiamine chloride hydrochloride, 0.05 cyanocobalamin, 0.03 mg lipoic acid, 0.03 mg riboflavin, 0.012 mg folic acid, and 10 mM pyruvate. The cells were collected by centrifugation (5000 rpm for 5 min at RT) and stored at -20°C for further use.

#### **Growth of *Haloferax volcanii*.**

*H. volcanii* was grown at 45°C and 200 rpm in Hv-YPC rich medium (4) containing: 144 g NaCl, 21 g MgSO<sub>4</sub>•7H<sub>2</sub>O, 18 g MgCl<sub>2</sub>•6H<sub>2</sub>O, 4.2 g KCl, 10mM Tris HCl (pH 7.5), 0.5% yeast extract, 0.1% peptone, and 0.1% casamino acids (w/v). The cells were collected by centrifugation (5000 rpm for 5 min at RT) and stored at -20°C for further use.

#### **Archaeal tRNA extraction.**

To extract tRNA, the frozen cells were thawed and resuspended in 50 mM Na acetate buffer pH 5.8 (3 mL buffer per 1g of cells). Equal volume of phenol saturated with mildly acid buffer (50 mM NaOAc pH 5.8) was immediately added to the cell suspension and shaken overnight at room temperature. The aqueous phase was recovered by centrifugation (20 min at 5,000 rpm), and another one volume of buffered saturated phenol was added. The phenol:buffer was vigorously shaken again for 2 minutes at room temperature. After centrifugation, as above, one volume of

chloroform was added and mixed vigorously again for 2 minutes at room temperature. The supernatant was recovered by centrifugation and adjusted to 20% isopropanol followed by one hour incubation at -20°C. The pellet containing genomic DNA and long RNA (mRNA and rRNA) was spun down, and the amount of isopropanol was adjusted to 60% final concentration. After one overnight standing at -20°C, the precipitated small RNAs (mostly 'soluble' RNA = tRNA) were recovered by centrifugation at 4°C, washed twice with cold 70% ethanol (to remove the salts from the cellular extract) and then once with cold 80% ethanol, dried and finally resuspended in 5000 µL water. Further purification steps were achieved on DEAE<sup>®</sup>-cellulose (Fisher Scientific cartridge/5 mL) column or on Nucleobond<sup>®</sup> AXR-400 (Clontech Laboratories); both last chromatography steps were performed according to the manufacturer's protocols. All tRNA extractions and analysis were performed at least twice, independently.

#### **Bulk tRNA digestion for LC-MS/MS analysis.**

Four hundred µg of bulk tRNA was resuspended in 100 µL water. To this solution were added 0.1 volume of 0.01 M ammonium acetate (pH 5.3) and 0.2 units of Nuclease P1. The solution was incubated at 45°C for 2 hours and then briefly cooled on ice. Then, 0.1 volume of ammonium bicarbonate (1.0 M at pH 7.0) was added along with 0.02 units of Phosphodiesterase I and 5.0 units of *E. coli* alkaline phosphatase. The resulting solution was incubated for 2 hours at 37°C. LC-MS/MS analysis was done on a high performance liquid chromatography (HPLC) system coupled to a hybrid triple quadrupole ion trap MS (4000 Q-TRAP; Applied Biosystems, Foster City, CA) equipped with a TurboIonSpray (TIS) interface operated in the positive ion mode at the Donald Danforth Plant Science Center - Mass Spectrometry and Proteomics Facility (St. Louis, MO)

### **tRNA<sup>Asp</sup> purification.**

tRNA<sup>Asp</sup> (GUC) was purified from bulk tRNA using biotinylated primers on Streptavidin sepharose resin (GE Healthcare, Pittsburgh, PA) according to Rinehart et al. (5). Four hundred  $\mu$ g of 5'-biotinylated specific primers (5'-biotin-CCCTGCGTGACAGGCAGG-3') in 6X NTE solution (20X NTE solution is 4.0 M NaCl, 0.1 M Tris-HCl pH 7.5, 50 mM EDTA, 5.0 mM 2-BME) were added to the Hitrap Streptavidin<sup>®</sup> sepharose HP R-10 1 mL column (GE Healthcare). Then, 4.0 mg of total tRNA (10 mg/mL in 6X NTE) were added and incubated at 65°C for 30 min. After incubation, the temperature of the mixture was decreased slowly to 30°C. The tRNA was washed three times with 3X NTE, 1X NTE, and 0.1X NTE until the absorbance ( $\lambda=260$  nm) of the wash was zero. The tRNA<sup>Asp</sup> retained on the beads was eluted with 1 mL of 0.1X NTE at 65°C. 1.0 M NaCl and 80% isopropanol was added to precipitate the tRNA. The pellet was washed with 85% ethanol and dried. The tRNA was resuspended in 50  $\mu$ L sterile water.

### **Strains and plasmids constructions.**

The  $\Delta queC::Kan^R$  allele was transferred by P1 transduction as described by (6) from the Keio collection strain JW0434-2 (7) into *E. coli* K12 MG1655 to create strain VDC7012 (MG1655  $\Delta queC::Kan^R$ ). The  $Kan^R$  marker was then excised as described by (8) to create VDC2047 (MG1655  $\Delta queC$ ). The deletion of the *queC* gene was verified by PCR using primers chkybaX.ol1 (5'-AGCATAACGCACATCTACAAT-3') and chkybaX.ol2 (5'-CATAACATCGCCTTCGTCGT-3'). The  $\Delta queF::Kan^R$  allele was transferred by P1 transduction from the from the Keio collection strain JW2765-2 (7) into VDC2047 and MG1655 to create VDC3274 and VDC3275, MG1655  $\Delta queC \Delta queF::Kan^R$  and MG1655  $\Delta queF::Kan^R$

respectively. The Kan<sup>R</sup> markers were excised from both strains to create VDC3280 (MG1655  $\Delta queC \Delta queF$ ) and VDC2043 and (MG1655  $\Delta queF$ ). The deletion of *queF* gene was verified by PCR using primers ckyqcD.ol1 (5'-CAAGGCGTTCCACGCAGCC-3') and ckyqcD.ol2 (TCAGCAGGTGGCTGACAAG).

The plasmid expressing SSO0016 (NP\_341593.1) under the P<sub>BAD</sub> promoter was a pMH4 derivative (Kan<sup>R</sup>, ColE1) gift from the Joint Center for Structural Genomics (La Jolla, CA). *P. calidifontis* JCM 11548 genomic DNA was extracted using Nucleobond<sup>®</sup> AXR-400 (Clontech Laboratories) according to manufacturer instructions. The *Pcal\_0221* (YP\_001055124.1) gene was amplified from genomic DNA by PCR using primers QueFLikepbad24.ol1 (5'-GGCGCCATGGTCAAGGTCTCCAAGTC-3') and QueFLikepbad24.ol2 (5'-GGCGGCATGCTTAGATGTAGACCGGCGGGA-3'). The obtained PCR fragment was digested with *NcoI* and *SphI* and subsequently ligated into pBAD24 (Amp<sup>R</sup>, ColE1) (9) after digestion with appropriate endonucleases to give plasmid pGPP358. VDC3280 ( $\Delta queC \Delta queF$ ) was transformed by pMH4::*SSO0016* and pBAD24 to give VDC3282 and VDC3281 respectively. VDC2043 ( $\Delta queF$ ) was transformed with pGP358 and pBAD24 to give VDC3368 and VDC3367 respectively

### **PCR conditions.**

Polymerase chain reactions (PCRs) were performed using Phusion<sup>™</sup> Hot Start, (New England Biolabs, Beverly, MA). For each PCR reaction, 100 ng of template DNA, 0.2  $\mu$ M forward primer, 0.2  $\mu$ M reverse primer, GC reaction buffer to 1X concentration, 200  $\mu$ M dNTP, nuclease free water and 1 – 2 units DNA polymerase per 100  $\mu$ l reaction were used. The thermocycling conditions for PCR were: 1 cycle of initial denaturation at 95°C for 1 minute, 30 cycles of

denaturation at 95°C for 15 seconds, annealing at 60°C, extension at 72°C for 30 seconds per kb, and a last cycle of final extension at 72°C for 10 minutes.

### **RNase T1 Digestion of tRNA and LC-MS/MS.**

Purified tRNA<sup>Asp</sup> was digested with RNase T1 by mixing 1 µg of the sample with 50 U of RNase T1 in 20 mM ammonium acetate and incubating for 2 h at 37 °C. Digestion products were separated using a Thermo Surveyor HPLC system with a Xterra C18 1.0 x 150 mm column (Waters) at room temperature at a flow rate of 40 µL/min. Before each run the column was equilibrated for 15 min at 95% Buffer A (200 mM HFIP, 8.15 mM TEA pH 7.0) and Buffer B (200 mM HFIP, 8.15 mM TEA:methanol, 50:50 v:v, pH 7.0). The gradient used was 5% B for 5 min, 30% B at 7 min and 95% B at 50 min and held at 95% B for 5 min. The eluent was directed into an LTQ-XL (Thermo Scientific) linear ion trap mass spectrometer. Analysis conditions were a capillary temperature of 275 °C, spray voltage of 4.5 kV, sheath gas, auxiliary gas, and sweep gas at 25, 14, and 10 arbitrary units, respectively. Collision induced dissociation (CID) tandem mass spectrometry (normalized collision energy 42%) was used in data-dependent mode to obtain sequence information from the tRNA<sup>Asp</sup> RNase T1 digestion products. Data-dependent MS/MS, with a Q value of 0.35 for 30 msec, was recorded based on the most abundant ion, and each ion was analyzed for 15 scans or 30 s before being placed on a dynamic exclusion list for 30 s.

## 2. Supplemental data 1

### Gat-QueC Sequences

>gi|327310688|ref|YP\_004337585.1| exsB protein [Thermoproteus uzoniensis 768-20]

MCSIGGVLIIFGDLDRERAAAIEAKLRAIAEAATERGRDSFGI AVLDRSGSYRVYKDRRPAPEALKDMP  
EM VGVDAVA AIFNNRAEPTTEHVERKTEDDIQPMLGERIAVTHNGTIANDVELERRYGLRRRSRIDTAVLPP  
LLEKVVWDGSLLEGLQRILRDEVVGSYALAVLDSARPGRLWLAANFRPLYMWDRLNALFFASSDAYLQGD  
VAPWDGNYVKRLEPYTVVEVGVDKTWRASLWKADAEPGRRRRALVVASGGLDSTTAAAALLRQGYEVAL  
LHFNYRHVAEDPERRAVREISKALGTPLIEVDMDFFKLAGRSPLLGEINRVDMGREGAEFAHEWVPA  
NFVFIALAVLAEAWGYDYVALGINMEEAGAYPDNEMELVRLNQLALPYATGPQRRVQLLMPVGGGLVKHE  
IVRLGLEVGAPLHLTWSCYDKGPKHCGRGCPYMRRLAFKINGVRDPVEYDLPPEEEEEFWRGTRPYVWR  
PPERRG

>gi|307594719|ref|YP\_003901036.1| exsB protein [Vulcanisaeta distributa DSM 14429]

MCTIGGVLIIFGDLDRDRAKRIEEVLRMIVVKGEERGRDSFGIVALDKNGELNVFKSRDRPSIAVSRMPS  
IINENTVAAIFNNRAEPTTEYVRAKTEDDIQPMIGEHVVAHNGTIANDKDLETKFNLTRRSRIDTAILP  
PLLERLWDGSLNGLRDVLIHVIGSYALAIMDTRRPGKVLATNFKPLYMAWYSDLKALFFASLDDYLVN  
DQGRPIWDMPTIRRVPEPYTAMEIGIDGTWSTVSLRREEQGRRRRVLVIASGGLDSTTAATYLLKQGYDVA  
LLHFNYGHRAETQEDRAIRRIAFLGVPLLEVSMDFFKVVRHSPLLGDGEINRVDEGREGAEFAHEWVPA  
RNFVFIALATAIAEAYGYDYIATGINLEEAGAYPDNEMEFIRLLNKVMPYAVGPNKHVELLMPVGHVVKH  
EIVKLGLEVGAPLHLTWSCYDNGERHCGRCGCPYMRRLAFKINGVRDPVEYDLPVEVEEEFWRDARPYKI  
PKRPSK

>gi|325969442|ref|YP\_004245634.1| exsB protein [Vulcanisaeta moutnovskia 768-28]

MCTIGGVLIIFGDLDEDRAKRIEEVLRMVIIKGEERGRDSFGIVSLSRDGELNVFKSKERPSVAVSKMPR  
MITEDTVA AIFNNRAEPTTEYVVKKNEDDIQPMIGERIVVAHNGTIANDKDLESKFGLIRRSKIDTAILP  
PLLEKFWGSLNGLFRDVLVNYVVGSYALAIMDTRRPGRVLWLNFKPLYMAWYGDGLKTLFFASLDDYLVN  
DWNKPIWGMPIVIRRVPEPYTAMEIGIDGTWSTVSLRKEGQVKKRVLVIASGGLDSTTAATYLLKQGYDVAL  
LHFNYGHRAETQEDRAIKRIAFLVHNPLFEVNMDFFKIVRHSPLLGDGEINRVDEGREGAEFAHEWVPA  
NFVFIALATAIAEAYGYDYIATGINLEESGAYPDNEMEFIRLLNRVMPYAVGPNKHVELLMPVGHVVKH  
EIVKLGLEVDAPLHLTWSCYDNGEKHCGRGCPYMRRLAFKINGVVKDPVEYELPKEIEEEFWMGARPYEVP  
KRPQG

>gi|159041826|ref|YP\_001541078.1| exsB protein [Caldivirga maquilensis IC-167]

MVECSVSGVLIFGEPDEARIRGIEDKLRSIVMRAEERGRDSWGIVTMSRDGGIKSFKSLGKASETLPKYS  
RLLDTDTVVAIANNRAEPTTEYVKEKGINDIQPMISEYVVVSHNGTIANDIELEGKYGIRKMSKIDSSIL  
PPLLEKAWDGSLEGLQKILRDEIIGSFALAIIDRRRPGRLWLVNFKPLYMWDRELNALFFSSLDTYLE  
DPDKPPWETNVVKRIEPIVSVIEVSREGGWRRSLWRVDSKPRRVLVVASGGLDSTTSATQLIKQGYDVT  
LLHFNYGHVAEGPEENAVRRIAFLNVPLLEVNMDFFKIVKHSPLLGDGEINRRREGITGAFAHEWVPA  
RNLVFIALAVIAEAMGYDYVATGVNLEEAGAYPDNEMEFIRLLNQVMPYAVGPNKHVELLMPVGHVVKH  
EIVKLGLEIGAPLHLTWSCYDKGPKHCGRGCPYMRRLAFKINGVRDPVEYDLPPEVEEEYWRGTPYRT  
PLPVGKRELQH

>gi|332797158|ref|YP\_004458658.1| exsB protein [Acidianus hospitalis W1]

MCSVSGALILNSKNYDKIERKFAEILKNAEDRGKDSFGIIVVQSDGTTKSVKSLGRPSEQEELKYLILDE  
KSRVVIANNRAEPTTEFVNKKTEDIQPFEGEFIVTHNGIANDKELEKKFGVKRESNIDTAVIPPILD  
KFWKGLDPLTKDLLSEIRGSFAFIITDKKNPNEIYIAQNFKPVYMMYDYELGAIFFTSLDDYFSQNPLDK  
VNITKLEPYSIVSVDSNLKIEKIDLIKPKDKKKVLVIASGGLDSTVAATYLLRQGHIEITLLHFNYRHKAE

EKEREAVRKISEYLQVPYIEIDTDLFKI IGHITLLKGGGEIVKERQGEEGAFAHEWVPARNLIFFSVAL  
AIAEAYGFDAIASGINLEEAGAYPDNEMEFVRLFSKLSPYATGPNKKIEVMMPVGNLVKHEIVKLGVEIG  
APLHLTWSCYEGGKHCCKGKGCPCYMRKMAFKINGLKDPEYEN

>gi|70606119|ref|YP\_254989.1| hypothetical protein Saci\_0280 [Sulfolobus  
acidocaldarius DSM 639]

MCSVTGVLILNPNHYKEIEKKLAKILIRAEDRGRDSFGIVVIQKDGSTKSSKHVKGPSLQEEKLYGILDE  
NSKVVIANNRAEPTTEYVRRKTENDIQPFEGEFVVTTHNGIIANDMELEKKYKVSKLSRIDSSVLPPVLD  
RSWNGNLDLSEILNSIRGSFALVIGDKKNPDRIFIAQNFKPVYMMYDRDLGAVFFTSLDDYFDATLNDN  
VTKLDPYSVVMVDDKLEIRKVPLLKEKNKRILVVASGGLDSTVAATYLVRQGHVETLLHFNYHHKAEK  
EREAVRKISEYLNVPFVEIDTDLFKIVGHSTLIKGSSEIVKDRKGEEGAFAHEWVPARNLIFFSVALA  
MAEAYGFDAIASGINLEEAGAYPDNEMEFVRFMSRLVPYAVGPNKKVEVLMMPVGNLVKHEIVKLGVEIG  
PLHLTWSCYEGGNKHCCKGKGCPCYMRKVAFAEVNGLKDPVEYEA

>gi|15922650|ref|NP\_378319.1| succinoglycan biosynthesis regulator  
[Sulfolobus tokodaii str. 7]

MCSVTGVLIIKPENYEKIEKKLIQILKRAEDRGRDSFGVIVIEKDGSVRKKVKGALGRPSTQEEKLYGILDE  
NSKVI IANNRAEPTTEYVRQKTEEDIQPFEGERYIVTHNGIIANDLELEKKNVIRRTKIDS AVVPPILD  
KYWNGEIEQLKKILNDIKGSFAFIIGDKKRPNRIYIAQNFKPVYMMYDRELGAIFFTSLDDYFDASAFDS  
VTKLDPYSIVEVNDNLEIRKIQLLDKKIKKVLVIASGGLDSTVAATYLLRQGYEITLLHFNYHHKAEERE  
REAVKIIAEYLQVPLIEIDTDLFKI IGHITLLKGGGEIVKDRKGEEGAFAHEWVPARNLIFFSVALALA  
EAYGYDAIASGINLEEAGAYPDNEMEFVRLFAKLSPYATGPNKKVEVMMPVGNLVKHEIVKLGVEIGAPL  
HLTWSCYEGGQKHCCKGKGCPCYMRKMAFRINGLNDPVEYEN

>gi|227831113|ref|YP\_002832893.1| exsB protein [Sulfolobus islandicus  
L.S.2.15]

MCSVSGVLILNPKNFDKVERKLADILKRAEDRGRDSFGIVVIQKDGTVKVRKSVGKPSSEKEELLYGILDE  
DSRVVIANNRAEPTTEYVRQKTEEDIQPFIGDRYIVTHNGIIANDLELEKKYELKRKTKIDSAILPSLLD  
KTWDGNIGTLKGILEQIRGSFALVIGDKRNHDIRIFLAQNFKPLYMAYDYSLESIFFTSLDEYFDVKKPFDL  
VNVTKLEPYSVVMVSSNKQITTLPIIEKRKKHKVLVVASGGLDSTVAATKLLREGHEVTLIHFNYHHKAE  
EREREAVRNIAEHLQVPLIEINTDLFKMIGHATLIKGGGEIVKDRKGEEGAFAHEWVPARNLIFFSAAL  
AIAEAYGYDAIASGINLEEAGAYPDNEMEFIRMLSKLSPYATGPNKKVEVLMMPVGNLVKHEIVKLGVEIG  
APLHLTWSCYEGGQKHCCKGKGCPCYMRVAFKINGLRDPVEYAE

>gi|229579998|ref|YP\_002838398.1| exsB protein [Sulfolobus islandicus  
Y.G.57.14]

MCSVSGVLILNPKNFDKVERKLADILKRAEDRGRDSFGIVVIQKDGTVKVRKSVGKPSSEKEELLYGILDE  
DSRVVIANNRAEPTTEYVRQKTEEDIQPFIGDRYIVTHNGIIANDLELEKKYELKRKTKIDSAILPSLLD  
KTWDGNIGTLKGILEQIRGSFALVIGDKRNHDIRIFLAQNFKPLYMAYDYSLESIFFTSLDEYFDVKKPFDL  
VNVTKLEPYSVVMVSSNKQITTLPIIEKRKKHKVLVVASGGLDSTVAATKLLREGHEVTLIHFNYHHKAE  
EREREAVRKIAEHLQVPLIEINTDLFKMIGHATLIKGGGEIVKDRKGEEGAFAHEWVPARNLIFFSAAL  
AIAEAYGYDAIASGINLEEAGAYPDNEMEFIRMLSKLSPYATGPNKKVEVLMMPVGNLVKHEIVKLGVEIG  
APLHLTWSCYEGGQKHCCKGKGCPCYMRVAFKINGLRDPVEYAE

>gi|323475431|gb|ADX86037.1| exsB protein [Sulfolobus islandicus REY15A]

MCSVSGVLILNPKNFDKVERKLADILKRAEDRGRDSFGIVVIQKDGTVKVRKSVGKPSSEKEELLYGILDE  
DSRVVIANNRAEPTTEYVRQKTEEDIQPFIGDRYIVTHNGIIANDLELEKKYELKRKTKIDSAILPSLLD  
KTWDGNIGTLKGILEQIRGSFALVIGDKRNHDIRIFLAQNFKPLYMAYDYSLESIFFTSLDEYFDVKKPFDL  
VNVTKLEPYSVVMVSSNKQITTLPIIEKRKKHKVLVVASGGLDSTVAATKLLREGHEVTLIHFNYHHKAE  
EREREAVRKIAEHLQVPLIEINTDLFKMIGHATLIKGGGEIVKDRKGEEGAFAHEWVPARNLIFFSAAL  
AIAEAYGYDAIASGINLEEAGAYPDNEMEFIRMLSKLSPYATGPNKKVEVLMMPVGNLMKHEIVKLGVEIG  
APLHLTWSCYEGGQKHCCKGKGCPCYMRVAFKINGLRDPVEYAE

>gi|227828356|ref|YP\_002830136.1| exsB protein [Sulfolobus islandicus  
M.14.25]

MCSVSGVLILNPKNFDKVERKLADILKRAEDRGRDSFGIVVIQKDGTVKVRKSVGKPSSEKEELLYGILDE  
DSRVVIANNRAEPTTEYVRQKTEEDIQPFIGDRYIVTHNGIIANDLELEKKYELKRKTKIDSAILPSLLD



KTWDGNLGLTKGILEQIRGSFALVIGDKRNHDRIFLAQNFKPLYMAYDYSLESIFFTSLDEYFDVKPFDL  
VNVTKLEPYSVVMVSSNKQITTLPIIEKRKKHKVLLVVASGGLDSTVAATKLLREGHEVTLIHFNYHHKAE  
EREREAVRKIAEHLQVPLIEINTDLFKMIGHATLIKGGGEIVKDRKGEEGAFAHEWVPARNLIFFSAAL  
AIAEAYGYDAIASGINLEEAGAYPDNEMEFIRMLSKLSPYATGPNKKVEVLMVPGNVLVKHEIVKLGYEIG  
APLHLTWSCYEGGQKHCCKGCPYMRVAFKINGLRDPVEYAAE

>gi|15896988|ref|NP\_341593.1| transcription regulator (exsB) related protein  
[Sulfolobus solfataricus P2]

MCSVSGVLILNPKNFELKELKASILKKAEDRGRDSFGIVVIQKDGTVKVRKSIGKPSKEEELLYGILDE  
DSRVVIANNRAEPTTEYVVRQKTEDDIQPFIGDRYIVTHNGI IANDLELEKKEYELKRKTKIDSAILPLLLD  
KTWDGNLEALKGILEQIKGSFALVIGDKKNPDRIFLAQNFKPLYMAYDHSLESIFFTSLDEYFDKPFDP  
VNITKLEPYSVVMVTSNKLIITLPIIMEKRKKYRVLVVASGGLDSTVAATKLLREGHEVTLIHFNYHHKAE  
EKEREAVRKIAEYLQIPLLEINTDLFKIIGHATLIKGGGEIVKDRKGEEGAFAHEWVPARNLIFFSVSL  
AIAEAYGYDAIASGINLEEAGAYPDNEMEFIRMLNKLSPYATGPNKRIEILMPVGNLVKHEIVKLGYEIG  
APLHLTWSCYEGGQKHCCKGCPYMRKMAFRINGLKDPVEYDEE

>gi|330835407|ref|YP\_004410135.1| exsB protein [Metallosphaera cuprina Ar-4]

MCSVTGVLILDPSTYLDVESKLSILIKAEDRGRDSFGIVSINVDGSVNQVKSLSGRPSKNQEKLGIVSE  
KTRVIVANNRAEPTTEFVRFKTEKDIQPFVGNRFVITHNGI IANDMEIEKKYEINRTTKIDSAILPPFLE  
KKWDGSLEGLRNSLKEKLSYALVIGDRLKPDRIFLAQNFKPIYMAYDFKLRAIFFFTSLDDYFDVQPFDE  
VNVKLEPYSVVEVSNKKEFRTL SLYDKPKRRALVIASGGLDSTVAATKMVKDGYQVTL LHFNYHHKAAE  
REREATRKIASYLNVDLIEVNTDVFTLIGESPLLKAGGEIVKERKGEEGAFAHEWVPARNSIFFTVAMA  
IAEARGYDTLVSGINLEEAGAYPDNEMEFVRFQRLSPYAVGPNKRVDIVMPVGNLVKHEIVKLGLDIGA  
PLHLTWSCYEGGEKHCGRGCPYMRKTAFEINGVKDPIEYQD

>gi|146303330|ref|YP\_001190646.1| exsB protein [Metallosphaera sedula DSM  
5348]

MCSVTGVLIMDP SKYAEVNQKLKLSILIRAEDRGRDSFGVIAVEEDGHVRSVKSLSGRPSLNQEKLDGIITE  
KTRVLVANNRAEPTTEFVRFKMERDIQPF LGDRFIVSHNGI IANDKEIEKKYEIKRLTTIDSAILPPLLD  
KKWDGKLETLRDILKELRGSYALVIADRERPDRIFLGQNFKPLYMAYDVLNAVFFFTSLDDYFDVKPFDH  
VNVKLEPYSVVEVTLNKEFRTL SLYAQPRRRALVIASGGLDSTVAATKMIREGYQVTL LHFNYHHKAAE  
KEREAVRKIASYLNADLMEINTDLFSLIGNATLLKGGGEIVKDRKGEEGAFAHEWVPARNAIFFTVAMA  
IAEAKGYDAIVSGINLEEAGAYPDNEMEFVRFQRLSPYAVGPEKRV DVLMPVGNLVKHEIVKLGLEIGA  
PLHLTWSCYEGGEKHCCKGCPYMRVAFEINGVKDPVEYESLDDQSRH

## List of QueF-like and QueF sequences used for alignment

### QueF-like sequences

>gi|118431468|ref|NP\_147965.2| putative GTP cyclohydrolase I [Aeropyrum  
pernix K1]

MLETAVDAVCPFTGAPDSYDVEIEYVSRDACLEALSLASWLESFRGVKISQEQLAHEIALTLKELLKPEY  
VCVKLTGSHGRVGMVVERCEDTSPTEDMGPI

>gi|124027916|ref|YP\_001013236.1| GTP cyclohydrolase I [Hyperthermus  
butylicus DSM 5456]

MQHKELRVVEGEACVEKVVLTGSVEAVCPVTGMVDLYRVIVEYKPSAGRVCRYIEALS FHFY LQSYKGR  
KILQEELTATIVRDFCEALGGGEVKVVTEGYHGPVGMRAEASGRCGGSA

>gi|18311862|ref|NP\_558529.1| GTP cyclohydrolase I, conjectural [Pyrobaculum  
aerophilum str. IM2]

MLKLSKNPQLVRLKTRGESVCPISKTVDSFEVTVEYIPRGAALAIIEEFKKIVDSYRGREILHEELAVDIM  
EKIKA AVNPPYVKVTVKSYIIGVEVEVVAESGGVQPLYI

>gi|145592346|ref|YP\_001154348.1| GTP cyclohydrolase I [Pyrobaculum arsenaticum DSM 13514]  
MLKLSKNPQLVRLKTRGESVCPISKTVDSFEVTLEYIPRGVALAIEEFKKMVDSYRGREILHEELAVDLL  
EKVKSVVNPPYVKVTLKSFYAGVEVEVVAESGGTQPLYI

>gi|126458846|ref|YP\_001055124.1| GTP cyclohydrolase I [Pyrobaculum calidifontis JCM 11548]  
MLKVSKSPSLVRLKTRGESVCPISKTVDSFEVSVVEYIPRGAVLAIEEFKKMVDSYRGREILHEELAVDLL  
EKVKA AVNPPYVKVTVKSYIIGVEVEVVAESGGVPPVYI

>gi|171185538|ref|YP\_001794457.1| GTP cyclohydrolase I [Thermoproteus neutrophilus V24Sta]  
MAHQPVLLKLSRPTLVRLKTRGEAVCPISKVVDSFEVTVEYMPRGGALAIEEFKRMVDSYRGREILHEEL  
AVDLMEKIKAAVNPPYVKVVLKSVYIGVEVEVVAESGGVPPVYI

>gi|119873451|ref|YP\_931458.1| GTP cyclohydrolase I [Pyrobaculum islandicum DSM 4184]  
MLKLSKNPSLVRLKTRGESICPISKVVDSFEISLEYIPRGVALSIEEFKKMVDSYRGREILHEELAVDIM  
ERVKA AVNPPYVKVVVKSIIYMGVEVEVIAESGGVPPVYI

>gi|307596129|ref|YP\_003902446.1| GTP cyclohydrolase I/Nitrile oxidoreductase [Vulcanisaeta distributa DSM 14429]  
MIRTIKAGPVDYVHLETFSFAICPVDHNIDNYVIEVDYKPTCSGGCIYMEINSLREYLDGFKDRVIYHE  
DLINELINEFVRTLNPIEITVTLTSNYKGIKYVIRRSINKRDSQHAP

### **7-cyano-7-deazaguanine reductase -NADPH dependent- oxidoreductase (QueF)**

>gi|16130701|ref|NP\_417274.1| 7-cyano-7-deazaguanine reductase (NADPH-dependent) [Escherichia coli str. K-12 substr. MG1655]  
MSSYANHQALAGLTLGKSTDYRDYDASLLQGVPRSLNRDPLGLKADNLPFHGTDIWTLTYELSWLNAKGL  
PQVAVGHVELDYTSVNLIIESKSFKLYLNSFNQTRFNNWDEVQRQTLERDLSTCAQGGKISVALYRLDELEGQ  
PIGHFNQTCIDDQDITIDNYEFTTDYLENATCGEKVVEETLVSHLLKSNCLITHQPDWGSLLQIQYRGRQI  
DREKLLRYLVSFRHHNEFHQCVERIFNDLLRFCQPEKLSVYARYTRRGGLDINPWRNSNSDFVPSTTRLV  
RQ

>gi|15598002|ref|NP\_251496.1| 7-cyano-7-deazaguanine reductase [Pseudomonas aeruginosa PAO1]  
MQHPAEHSPLGKTSEYVSSYTPSLLPFISRTAKWAEGLSAETLPYRGVDIWNICYELSWLTPAGKPVVAI  
GEFSIPADSPNIIIESKSFKLYLNSLNQSAFDSREALRAVLQKDLAAVAVGAPVGVRLRSLDEVAEEGIGRL  
PGRCIDELDIAVDGYEQPRPELLRCDAGRIVEEQLYSHLLKSNCPVTGQPDWGTLVVDYRGPALDPASLL  
AYLVSFRQHQDFHEQCVERIFLDLQRLQALSVYARYVRRGGLDINPYRSLAEVAPDNRRLLVRQ

>gi|37524663|ref|NP\_928007.1| 7-cyano-7-deazaguanine reductase [Photorhabdus luminescens subsp. laumondii TT01]  
MSLYRDHQALEQLTLGKTTLYRDQYDASLLQAVPRNMNREPLEIFPDNLPFHGADIWTLTYELSWLNNRGL  
PQVAVGHVSLNAASTNLIIESKSFKLYLNSFNQTRFENWQAVEETLQRDLAACAEGEVEVALHHLDFHNNQ  
PISTFTGECIDDQDIEVTEYDFNRHYLQNAAQGPQVEEVLVSHLLKSNCLITHQPDWGSVQIHYKGSKIN  
REALLRYLVSFRHHNEFHQCVERIFSDLQQLCAPEKLSVYARYTRRGGLDINPWRTNSEGFVPATGRLA  
RQ

>gi|22127023|ref|NP\_670446.1| 7-cyano-7-deazaguanine reductase [Yersinia pestis KIM 10]  
MSSYQNHKALAEELTLGKPTAYCDYDATLLQAVPRSMNREPLGLYPDNLPHGADIWTLTYELSWLNSNGL  
PQVAVGEISLNADSNLIESKSFKLYLNSFNQTFADKESVRMTLQRDLAACAQGNVSVLYDLDEITGQ  
PISNFGNCELDKQDIRIDSYEFNADYLQGAAGKDHVESLVSHLLKSNCLITHQPDWGSVQIHYRGPQID  
HEALLRYLVSFRHHNEFHQCVERIFNDIMRFCQPETLTVYARYTRRGGLDINPWRNSNTDFVPLTGLRLAR

Q

>gi|229846813|ref|ZP\_04466920.1| 7-cyano-7-deazaguanine reductase [Haemophilus influenzae 7P49H1]

MNYQDNSLKSLKLGQKTEYASQYDRTLLQPVPRALNRDGLGITQNQPFTIGADIWTAYEISWLNEKGLPQ  
VAIADIYLDYQSQNLIIESKSFKLYLNSFNQSKFTDFNAVQQTMRDLIECAQGDVVKVRLNPVAVYDAQKI  
EHLQGDICIDEQDIEITSYEFNANWLKDCVSDEIVEEKLVSHELLKSNCLITNQPDWGTLHIHYVGKINQE  
KLLRYVVSFRQHNEFHEQCVERIFCDLMHYAKPEKLTVYARYTRRGGLDINPFRSNFENLPENLRLARQ

>gi|121588138|ref|ZP\_01677885.1| conserved hypothetical protein [Vibrio cholerae 2740-80]

MNRLKNMSKYSDAKELASLTGKKTAYANQYDPSLLQPVPRSLNRNDLHLSATLPFQGCIDIWTLYELSWL  
NQKGLPQVAIGEVSIPATSANLIESKSFKLYLNSYNQTRFASWDEVQTRLVHDLACAGETVTVNVKSLN  
EYTAEPVITMQGECIDDQDIEIANYEFDDALLQGAAQGEVSEVLHSHLLKSNCLITNQPDWGSVEIAYH  
GAKMNREALRLYLVSFRHNEFHEQCVERIFTDIMRYCQPQSLTVYARYTRRGGLDINPFRSSHQSAPNH  
NQRMARQ

>gi|24114078|ref|NP\_708588.1| 7-cyano-7-deazaguanine reductase [Shigella flexneri 2a str. 301]

MSSYANHQALAGLTGKSTDYRDTYDASLLQGVPRSLNRDPLGLKADNLPFHGTDIWTLYELSWLNAKGL  
PQVAVGHVELDYTSVNLIIESKSFKLYLNSFNQTRFNWDEVQRQTLERDLSTCAQGGKISVALYRLDELEGQ  
PIGHFNQTCIDDQDITIDNYEFTTDYLENATSGEKVVEETLVSHLLKSNCLITHQPDWGSIQIQYRGRQI  
DREKLLRYLVSFRHNEFHEQCVERIFNDLLRFCQPEKLSVYARYTRRGGLDINPWRNSNSDFVPSTTRLV  
RQ

>gi|16078439|ref|NP\_389258.1| 7-cyano-7-deazaguanine reductase [Bacillus subtilis subsp. subtilis str. 168]

MTTRKESELEGVTLGNQGTNYLFEYAPDVLESFPNKHVNRDYFVKFNCPEFTSLCPKTGQPDFATIYIS  
YIPDEKMVESKSLKLYLFSFRNHGDFHEDCMNIIMNDLIELMDPRYIEVWGKFTPRGGISIDPYTNYGKP  
GTKYEKMAEYRMMNHDLYPEIDNR

>gi|15923718|ref|NP\_371252.1| 7-cyano-7-deazaguanine reductase [Staphylococcus aureus subsp. aureus Mu50]

MAHGRQQDELQDITLLGNQDNTYNFDYRDPDVLESFDNKHQGRDYFVKFNCPEFTSLCPITGQPDFATIYI  
SYIPNVKMVESKSLKLYLFSFRNHGDFHEDCMNIIMNDLIELMDPHYIEVWGKFTPRGGISIDPYTNYGR  
PNSKYEKMAEHRMLMNHDLYPEKIDNR

>gi|15606257|ref|NP\_213635.1| hypothetical protein aq\_931 [Aquifex aeolicus VF5]

MEAKEKKYGEIEIEKAQLEAWPNPNPERDYMIEITFPEFTCLCPRSGYPDFATIKIRYIPDKYIVELKSL  
KLWLNKFRNRYISHEAATNEIYQALYDLLKPRFLEVVGDFHPRGNVHTVVRVRSDENYG

>gi|30250215|ref|NP\_842285.1| 7-cyano-7-deazaguanine reductase [Nitrosomonas europaea ATCC 19718]

MTTQPSKQLETFFENPVQTRDYRIHMEIPEFTCLCPKTGQPDFARLTLDYIPDKKCIELKSLKLYIWSYRD  
EGAFHEAVTNRILDDLVAAMKPRFIRLTSKFYVRRGGIFTNVVAEHRKKGWQPPVLLLEVFEQQFNTHG

>gi|57236909|ref|YP\_179862.1| 7-cyano-7-deazaguanine reductase [Campylobacter jejuni RM1221]

MRYGEKEIKEFDVENMEIWPNDKNDYIIKITLPEFMCCCPRSGYPDFATIYLEYMPNKFVVELKAIKLY  
INTFMYRNVSHEASINEIYNTLKDKLKPKWIKVVGDFNPRGNVHTVIECRSDMVVVK

>gi|291276630|ref|YP\_003516402.1| NADPH-dependent 7-cyano-7-deazaguanine reductase QueF [Helicobacter mustelae 12198]

MKDLSLLGKQDVEYAFHYNPKILETFENRHKENDYFVKFNCPEFTSLCPMTGQPDFATIYINYIPQHKMV  
ESKSLKLYLFSFRNHGDFHENCNVNIMKDLIGVMEPKFIEVWGKFLPRGGISIDPYANYGLPNTKYEEMA  
HYRLLHHDLSFEKIDNR



### 3. Supplemental data 2

gi|14521321|ref|NP\_126796.1| 7-cyano-7-deazaguanine tRNA-ribosyltransferase  
[Pyrococcus abyssi GE5]

```
MSRGDKMLKFEVKARDGAGRIGKLEVNGKKIETPAIMPVVNPKQLIVEPKELEKMGFDIIITNSYIIYKD  
RELREKALEVGIHKLLGYDGIIEVDSGSFQLMRYGNVDVSNREIVEFQHRIGVDIGTFLDIPTPPDAPKE  
KAMEDLKITLERAREAEIEKEIAMNAAIQGSTYTDLRRYAARRLSSMNFEIHPIGGVVPLLEAYRFREVV  
DIVISSKMALRPDRPVHLFGAGHPMVFALAVAMGVDLFDSASYALYAKDDRYLTPEGTKRLEDELEYFPCS  
CPVCSRYTPQELREMPKEERARLLAIHNLWVIKKEIERIKQAIREGELWRLVDERARSHPKLYSAYKRLL  
DHYTFLEEFEPVTKKSAVFKISHESLRWPLVRRARERAERVNSKFGDLVEHPIFGKVTKYLTLYPFAQS  
EAEDFSIEKPTRENAIRYVMAIAEYQFGENASKAFEGAEVELARTGMQRQVKLNGKRLATVRAEDGFLT  
LGIEGAKRLHKVLEYPRMRVVVSEEAEPFARKGKDVFAKFVLFADPGIRPYDEVLVVNEKDELLATGQAL  
MSGREMIVFQYGRAVKVRRGISGG
```

>gi|14590946|ref|NP\_143020.1| 7-cyano-7-deazaguanine tRNA-ribosyltransferase  
[Pyrococcus horikoshii OT3]

```
MSRGDKMLKFEIKARDGAGRIGKLEVNGKKIETPAIMPVVNPKQMVVEPKELEKMGFEIIIITNSYIIYKD  
EELRRKALELGIHRMLDYNGIIEVDSGSFQLMKYGSIEVSNREIEFQHRIGVDIGTFLDIPTPPDAPRE  
QAVKELEITLSRAREAEIEKEIPMNATIQQSTYTDLRRYAARRLSSMNFEIHPIGGVVPLLESYRFRDVV  
DIVISSKMALRPDRPVHLFGAGHPIVFALAVAMGVDLFDSASYALYAKDDRYMTPEGTKRLELDYFPCS  
CPVCSKYTPQELREMPKEERTRLALHNLWVIKKEIKRVKQAIKEGELWRLVDERARSHPKLYSAYKRLL  
EHYTFLEEFEPITKKSALFKISNESLRWPVVRRAKERAKSINERFGELVEHPIFGRVSRYSLSLYPFAQS  
EAEDDFKIEKPTKEDAIKYVMAIAEYQFGEASRAFDDAKVELSKTGMQRQVKVNGKRLATVRADDGLLT  
LGIEGAKRLHRVLPYPRMRVVVNKEAEPFARKGKDVFAKFVIFADPGIRPYDEVLVVNEDELLATGQAL  
LSGREMIVFQYGRAVKVRKQVE
```

>gi|18977418|ref|NP\_578775.1| 7-cyano-7-deazaguanine tRNA-ribosyltransferase  
[Pyrococcus furiosus DSM 3638]

```
MSRGDSMLRFEIKDRDAAGRIGKLEVNGKKIETPAIMPVVNPKQLIVEPKELKRMGFDIIITNSYIIYKD  
KKLREKALEKGIHRLLDYDGIIEVDSGSFQLMRYGKVEVTNREIVEFQHKIGVDIGTFLDIPTPPDAPRE  
KAEQDLKITLERAKEAESIKQIPMNATVQGSTYLDLRKLAARKLSEMNFIEHPIGAVVPLLESYRFKDVV  
DIVIASKMGLRPDRPVHLFGAGHPMVFALAVAMGVDLFDSASYALYAKDDRYLTPQGTRKLEELEYFSCS  
CPVCSKYTPQELREMPKEEREKLLALHNLWVIREEINRVKQAIKEGELWRLVDERARAHPKLYAAYKRLL  
EYYHYLEEYEPITKKSALFKISEESLKWPIARRAKERAEKVKAKFPESIPHPIFGEIPKYLSTLYPFAQS  
ESEEDFQIEKPTRENAIYMAIAEYQFGEAGEAFRDAEVEIAKTGMQRQVKKNGKRLATVRAEDGLLT  
LGIEGAKRLHELLPYPMRVVVVNKEAEPFARKGKDVFAKFVEFADPKIRPYDEVLI VNEDELLATGQAL  
LSGREMVLFSGRAVKTRRGVEEKK
```

>gi|57640695|ref|YP\_183173.1| 7-cyano-7-deazaguanine tRNA-ribosyltransferase  
[Thermococcus kodakarensis KOD1]

MVDFRFEVKARDASGRIGKLTVNGKTIVETPAIMPVINPKQLIVTPKELKEMGFGMIITNSYIIYKTPELR  
EKALEVGIHKLLDYDGIIEVDSGSFQLMRYGGVEVTNREIVEFQHEIGVDIGTFLDIPTPPDAPREKAEE  
DLRITLERAKEAEEIKEIAMNAAVQGSTYDLRTYAARELSRMNFEIHPIGAVVPLMESYRYRDLVDVVI  
ASKVGLRPDRPVHLFGAGHPMIFALAVAMGIDLFDSASYALYAKDDRYMTPEGTKRLEELEYFPCSCPVC  
SRYTPQELREMPKEERTLLAIHNLWVIREELNRVKQAIKEGELWRLVDERARSHPKLYAAYKRLLEYRE  
YLEKNEPVTKASAFFKVSEELRWPIVERARERAERVRSKFPETISHPIFGEIPKYLSLSYPFAQSEGEE  
DFTVEKPEKGEARKYVMAVAEYQFGEGAGEAFKDAFVELSRKTGMPRQIKAKGKHLATFRAEDGLLTLGI  
EGAKRLHEVLFPFRMRVVVDEDAEPFARRGKNVFAKFVVDADLNIRPYDEVLVVNRNDELLATGQTLNNG  
EELKIFQQGLAVKVRGVEK

>gi|15678204|ref|NP\_275319.1| 7-cyano-7-deazaguanine tRNA-ribosyltransferase  
[Methanothermobacter thermautotrophicus str. Delta H]

MISLISRGNTLLMTLWEDFMFEIKSKDGLGRTGILKTEHGTVRTPALMPVIHPGKQOTIDVKGPGAEIVIT  
NAYIIYRNPELRERALS DGVHRLIDFDGPIMTDSGSFQLSEYGDIEVENPEIIRFQDEIGTDIGTSLDIP  
TPPGVSHRRAIEEVEVTLERARESIEYRERMMLNAVVGSTHPDLRRYCASRLAELPVELHPIGAVVPLM  
ESYRYRELVDVAVLSSVSELPPSRPRHLMGAGHPMLFALAVSMGCDLFD SAAYILYAEDDRLLSTEGTYKL  
ENLQEMPCSCSVCTDYTPSELGMGDREERNLIAEHNHLSVFAEIRKVRQAIHDGNLMELVEERCRAHPR  
LLEGYRRMSEYLDLIEKFEPKRSKSAFFYTGPESLGRVEVHRHLKRVKEHLGERLALVAPSRPYSSSLP  
ARIGGFSSLRPQSGGPWRVVVDLPFGIIPLELDQVYPLAQSDAPGIMDLDGEEFLRGLVRDLMDGDAIV  
DDALCSELGIELPYKYMGEVETTVDLDRVMVADYQFGMGAGELLFTDDVRIERSRNTGKIRHIYAGDE  
LICTMRASDGLLVGAEGAVRLHKGTDYPAWRVAVNEESEPFARKGKSVFAKFIIDCDNNIRANDEVLIV  
NADDELLATGKALLCAEEMMDLNHGQAVKTRKGGF

>gi|45358173|ref|NP\_987730.1| 7-cyano-7-deazaguanine tRNA-ribosyltransferase  
[Methanococcus maripaludis S2]

MFEIKARDAMGRG SITINGKKIETPTIMPVIHPNPKKQTVSMDLINKMADVITNSYITYTTPELREIA  
ETKGIHELIDFKNVVVTDSGSFQLSVYGDVNVGPMEIIDFQEKIGVDVGTILDIP TGPDSREKAESDLI  
ETFKRAEDSIKRRKEMGYKLALNGTIQGSKYLDLRQKSAEVMGKMDFDIYPIGAVVPLMEDYRYREVAEV  
ILNSKMHLPTNKPVHLFGCGHPMLFALSVALGCDLFD SAAYALYAKNGRYLTADGTLHLKMDKDLKSFPC  
TCKVCSEYTPKQLYNLEEKEKTRLLAEHNLYVTFEEDRIKNAIKEGNLWELVEERCRSHPKLLNGLRVI  
SKYMDFIEKHDPVSKKSGFFYTGYESMNRPEIYRHKQRLDRIQYDKIYVTSVSENTSKPYSENLSNVPCD  
VDVLVKDSVFGVPLNIDTMYPLAQNEVPDLYDFEKYNNFVSEFNEKHAEKILDISTYNYIINHYGKK  
KECDKINPDIFRIGKMLEYQYGA KILDEELMEKVKSRRSKNTGRIRNLLLEKEVLF TLRANDNFLIPAKS  
GAELLHEKLEFPKYRIVIDSSVEEFARAGKSVYSKFKDCPELRPFEEVLIVNSDDELLAYGTTILNGR  
ELMEFDYGVAATLRGGLKK

>gi|159904673|ref|YP\_001548335.1| 7-cyano-7-deazaguanine tRNA-  
ribosyltransferase [Methanococcus maripaludis C6]

MFEIKARDAMGRG VITINGKKIETPTIMPVIHPNPKKQTVSMDLINKMADVITNSYITYTTPELREIA  
ETKGIHELIDFKNVVVTDSGSFQLSVYGDVNVGPMEIIDFQEKIGVDVGTILDIP TGPDSREKAESDLL  
ETFKRAEDSIKRRKEMGYKLALNGTIQGSKYLDLRQKSA DVMGKMDFDIYPIGAVVPLMEDYRYREVAEV  
ILNSKMHLPTNKPVHLFGCGHPMLFALSVALGCDLFD SAAYALYAKNGRYLTADGTLHLEDMDKDLKNFPC

TCKVCSEYTPKQLFNLEEKEKTRLLAEHNLYVTFEEIDRIKNAIKEGNLWELVEERCERSHPKLLNGLRVI  
SKYMDFIEKHDPVSKKSGFFYTGYESMNRPEIYRHKQRLERIQYDKIYVTTVSENTSKPYHENLDNVPCD  
VDVLIKDSVFGVPLNIDTMYPLAQNEVPDLYDFEKKYNNEFVSNFMEKNSEKILDISTYNYIINHGYTK  
KECDKINPDVFRVGMLEYQYGAKILDDELMEKVKTRRSKNTGRIRNLLLEKEVLFTRANDNFLIPAKS  
GAELLHEKLEFPKYRIVIDSSVEEYARAGKSVYSKFKDCPELRPFEEVLIVNSDDELLAYGTTILNGL  
ELMEFDYGVAATLRGGLKK

>gi|134046031|ref|YP\_001097517.1| 7-cyano-7-deazaguanine tRNA-  
ribosyltransferase [Methanococcus maripaludis C5]

MFEIKARDAMGRLGVITINGKKIETPTIMPVIHPNPKKQTVSMDL INKLADVITNSYITYTTPELREIA  
ETKGIHELIDFKNVVVTDSGSFQLSVYGDVNVGPMEIIDFQEKIGVDVGTILDIPDTPGVSREKAESDLL  
ETFKRAKDSIKRRKEMGYKLALNGTIQGSKYLDLRQKSAEVMGKMDFDIYPIGAVVPLMEDYRYREVAEV  
ILNSKMHLPTNKPVHLFGCGHPMLFALSVALGCDLFD SAAYALYAKNGRYLTAEGTLHLEDMDKLSFPC  
TCKVCSEYTPKQLFNLEEKEKTRLLAEHNLYVTFEEIDRIKNAIKEGNLWELVEERCERSHPKLLNGLRVI  
SKYMDFIEKHDPVSKKSGFFYTGYESMDRPEIYRHKQRLERIQYDKIYVTSVSENTSKPYHENLSNVPCD  
VDVLIKDSVFGVPLNIDTMYPLAQNEVPDLYDFEKKYNNEFVSEFREKHTEKILDISTYNYIINHGYTK  
KDCDKINPDIFRIGKMLEYQYGAKILDDELMDGKVKSRRSKNTGRIRNLLLEKEVLFTRANDNFLIPAKY  
GAELLHEKLEFPNYRIVIDSSVEEFARAGKSVYSKFKDCDHELPRPFEEVLIVNSDDDLLAYGTTILNGQ  
ELMEFDYGVAATLRGGIKK

>gi|15668612|ref|NP\_247410.1| 7-cyano-7-deazaguanine tRNA-ribosyltransferase  
[Methanocaldococcus jannaschii DSM 2661]

MEIIEFQERIGVDVGTILDIPDTPDVRERAEKELEETLKRAKASIELKEERGFKLLLNGTVQGSTYLDL  
RQKSAKEMAKLGFDIYPIGAVVPLMEQYRYRDAEII INSKMYLPTNKPVHLFGCGHPMFFALAVAGCD  
LFDSAAYALYAKDDRYLTERGTLHLEEIKDLKAFPCSCPVCSSYTPKELASLNKKERERLLAEHNLYVTF  
EEINRIKQAIRDGLWELVEERVCHPKLLEAYRVVRKYIDYIEKFDPVTKKSAFFYTGIESMFRPEVLR  
HKKRLKRLRYEKVYITTVSSIEKPYHEHLNVVETDVIDILIKDPVFGFIPYYIDTVYPLSQHEIPELFDY  
EKEINKRFVDEFIDWLKKGIGEDNILDIMTYNYIYNYFSANKKINADALRIRKMLQYQYGFDIIDDEL MN  
KIKVVRSKTTGRLRQVLDENGEILFSVRSNDNLLIPSEKGA LLWKKIPFPKYRVVVNKEAEFAREGRN  
VFAKFVIDCDEELRPYEEVLVNVNEDDELLAYGTTILNGIELREFNYGLAVKVRGGLKINK

>gi|170290974|ref|YP\_001737790.1| tRNA-guanine transglycosylase [Candidatus  
Korarchaeum cryptofilum OPF8]

MGLYFRVRKSDASARLSELKTKSGTLILPEFFPVYNPNKPVITPREMSEMGIKAIITNSYLIYRSPELRE  
AAIERGIHSLGFDGVVMTDSGAYQIYRYGRVDVTNSEILRFQHSIGSDIGSILDVPMSSIEGREEAESG  
VERTIRNAEEWASMREELSNTLWVGTPQGSYRDLVIKCSERIRELDFDYNVGSIKVALEKYDFVTQVD  
HFMSIRSILRAGKPFHFWGIGHPSTFAFFAAIGADSFDSASYSLYAEQGRYMPHGTL LLLDEIEEFPCSC  
PVCSSHDPKEVKAMSKEERTKLLAKHNLYISISEIKKVREAIRGEWLWELVQERSRFHPNLYFALMHLR  
RYSSLLEAREPLFKSSGLQCSGPESFLRPEVVRARNRLKYIHYNGKFRRVLYGDVPLGLKYLYPFGQTIC  
PYDEEVQDEPEDDEIITCVLSYQYEFPPKLP AIMRRSKSTGT LREVSLEGKVI GHFRPN DGAFIPTLDG  
ASLILSHLPYPKGRVVVKGLFSDTVARGTTVFVKFVKEADPSIRPKSEVIVVNESDELLATGKAVLSGVE

YHQYHPDHPFIIIRRHVKPRSEEKPEVDS

>gi|20093628|ref|NP\_613475.1| queuine/archaeosine tRNA-ribosyltransferase  
[Methanopyrus kandleri AV19]

MNVAFEVKDRDVAGRLGRLEVNGRRLKTPALLPVVNPKNPTLDPREISKLGFDGVITNAYIIRKHEHLRE  
QALEEGVHGLLGFDFVMTDSGSFQLAEYGDVEVSNEEIVRFQAKIGSDVGTILDVPTPPDAPRSRVERD  
LETTLKRAREAVELDEHPPLALTVQGSTYEDLRRLCAEKLAELPAAVYPVGGVVPLLEEYRFVDVVRVVL  
AAKSSLPHPRPVHLFGCGHPLAIPLAVAMGCDLFDASAYAIYARSDRYMSILGTLKLEELTFPCSCPAC  
TRHDPDDVREMEPRERTRVLATHNLYELRRVIETTRQAIIVSGELWELAESVCRAHPRAWAGMVVELARRGG  
ELERWCPAVKRSVFCDEVSFKRPELRRLYRRRLRDRFGELSGRKVVKGISRPYAEIVEWLEPWELAFADE  
WLGVVPGELSWSYPCHCLVEPSGDDEGEDRRRGEEGRRR

>gi|16082455|ref|NP\_394944.1| 7-cyano-7-deazaguanine tRNA-ribosyltransferase  
[Thermoplasma acidophilum DSM 1728]

MKIEERDGLARIAKFETPHGPIETPTVLPVINPNIMNITPQEMKPLGLQGIITNSYIILRTPELRERLR  
EGLHSLIGYDGPIMTDSGTFQSYVYGSIEFNNREVVDFQRRIGSDISTILDVFTTPGTPKPEAEKAVIET  
YNRMLEVNDEEGI IAGPVQGGVYDPLRQKSAELMNSTNAGYHP IGGVVPLLETYDYSTLVDII INSKINL  
SFKPKVHLFGGGHPMFFAFSVYLGVDLFDASAYIKYAKDDRLIYDPGTRDLARITELPQWSPLYDRYTVK  
EIRDLDKERRSLEIARHNLKAI FMEI SEIKERIYEEGLAQYVAQKARSHPSLMKAYSRIMSYSNILEKYE  
DLSKKTAYFFYDSFSTRNPYVSRINRFTE SYLSSNKD TYAFTYRAWNPGYTNSEFVRDVYQKIDCNALI  
SWSGTFVPAELENTYPIEQTVSSGFEPDPDF SRAKDLIAPFRVDMYKGEKFEQEQRVSNLNKIRMVADY  
QFGSGVGRMIFRDDVRINVSKTGRIRGILSKEGRQIATMRNDGFFTLTYYGASLIHSQLKPPAMRVTVSK  
ESAEYNAKGYSVFFKFILGSDENIIAKNDVLVDEDDVLA AVGKAMVSGRELREYTEGIAVKVHEGRDQS  
EK

>gi|13542328|ref|NP\_112016.1| 7-cyano-7-deazaguanine tRNA-ribosyltransferase  
[Thermoplasma volcanium GSS1]

MEIRERDGLARIARFDTPHGTIETPTVLPVINPNIMDITPEEMKKYGVHGVITNSYIILRNDRLREEAEK  
YGVHSLIGYDGPVMTDSGTFQSYVYGSVEFNNRQVVEFQKTIGSDILTILDIFTTPSSSRQEVENAITET  
YRRMLEVNDAGGMIAGPIQGGIYDPLRKRSAELMNSTNASYLP IGGVVPLLESY EYDKLVDIILNSKLN  
SFGKPIHLFGGGHPMFFAFAVYLGVDLFDASAYVYKAKDDRLIYDPGTRDLARIEIPEWSPLFDKYTVK  
ELKELPKEQRSVELSRHNLKAI FMEI SEIRERIYEE SMDQYLAQKAKSHPSLLKAYVKVMQYSKMLEKYQ  
DLFKKAAYFFYDSFSTKNYVARLEKFTSKYLTSKKKETYVFSRKDWLPGYTNLNFVRDVYERTECNALI  
PWSGIMVPAELENTYPIEQTVSSGLEPDPDVSAISESISPFDIRVYKGESVDSKIRSFDFLEKIRTIADY  
QFGYGIGKDFKDDVRIFKSKTGRIRGVFDKGNKLIATLRNDGFFTLTFHGATLLYNVSKSPNLRVFKV  
ESAEYNAKGYSVFFKFILDADPDI IAKNETLVVNENGELVAVGKATVSGKELREYSDGIAVKIHEGRDQS  
AK

>gi|48477526|ref|YP\_023232.1| 7-cyano-7-deazaguanine tRNA-ribosyltransferase  
[Picrophilus torridus DSM 9790]

MEILFRENLARIARFKTPHGEIETPTVMPVINPNLNFLDESTLRSYGVQAVITNSYI IKNRQRLNEDALR  
HGLHSLIKFSGPIMTDSGTFQSHVYGDIEYSNKEIVDFQKAIGSDIITILDVFTPEDESYSNARSKVIET



YKRLKEIDFEDKIIAGPVQGSIIYDPLRRLSAYLMSDALYLP IGGVVPLLESYRYSDLVKIIFNSKVSSDF  
SRPVHLFGGGHPMFFAFVAVMLGVDLFDSASYIKYAKDNRLLYSEGTRALNDIREFPEWSPHKGKYPQEL  
LHEESEKRTRMLALHNLKSI FIEINEIKERIYENTLYNYVEEKARSHPALFKAFMSMINYDTSYSPLSY  
KSPFFYYDKTSLNHPIIKRIMKFTENYISNSRHTLIIS SKYWRPGVKNENVIKNIVECTDFNLLVSWNGI  
YIPLFLEDSPVQQLVSSGLNDKLEEDYLKRLK SINNDIEFYEGEHYDKRLRDYDTEKINTIAMFQFNI  
NERFFDKSNIKSKSTGHIRNI IEDNNIIATMRNDGYLTLSIKGAYRLLSMKPWPGLRVVVDDESGRFNA  
NGYNVFFKFIKSFDTGIIPGNETLVVSEDDDLAVGKAAVSGIEMYYYYKSGVAVKVHEGVNKKAA

>gi|257076281|ref|ZP\_05570642.1| 7-cyano-7-deazaguanine tRNA-  
ribosyltransferase [*Ferroplasma acidarmanus fer1*]  
MFFREGLARIGKFSTPHGDIETPTVMPVINPNLFLTKEELK SIGVQAVITNSYIIKRTASLEQDALKHG  
VHRLINFDGPIMTDSGTFQSYVYGDIEYGNKEIVQFQKDIGSDIITILDIFTK PQDSYEQAKAAVYETSR  
RLQEVNTPDSIIAGPIQGSIIYDPLRRESARLMSEASYLPIGGVVPLLESYRYSDLVNI IINSKLNSDFSK  
PVHLFGGGHPMFFAFVSVLLGVDFDSASYIKYAKDNRLVLYTEGTRNLKEIRDFPEWSPLFNKYSPVELIK  
ADEKTRLKLLSLHNLKAI FNEITEIKERIYENTLYQYVEEK SMAHPALYRAYLEMLDHNLEPFWNISLKS  
PLYFFNSSTYKNTFIKRLVKFTEDYISNGKKT VLVSYRQWRHGFVSDDILRSYETTDYNFLIEWNDIFI  
PMELENTY PVSQMVPSGVLDKIYRDDYIAWLK SINNDISFYDPSITGSEKIRNYSHSKINEVFHLQFKAR  
KNL FVNSDKIIKSKATGHIRNIKRGEKIIATMRNDGFLTLSIYGGKLLNDMLDFPASRVIVTDDSGEFNS  
QGYNVFFKFVEDCDREIIAGNDVMVTSASGDLYAVGHATVSGKEMGFYRNGI AVKVHEGINKL

>gi|84489330|ref|YP\_447562.1| 7-cyano-7-deazaguanine tRNA-ribosyltransferase  
[*Methanospaera stadtmanae DSM 3091*]  
MVDIIVDFEIKYKDAMARVGKFKTPHGTVTTPALMPVVHPGKQTL DVKKLGAQIVITNSYIIYKNEELKK  
KALEEGVHSLIDFPNTIETDSGSFQLSVYGDIDITNEEVIKFQEAIKTDIGTSLDIPTAPYVKREEAEND  
LEITIERAKEAANVKS DLLLLNSVVQGSTFPDLREKCAKEISKYDADIYPIGAVVPLMEMYRYADLVDAVM  
YSMRGLPENKPRHLMGAGHPMV FALATAMGCDLFD SAAYILYANKDRFMMPDGTLRLEDLIEMPCSCRVC  
CEYTVDELKQMDQKKRAKLI AEHNLHISFAEIRRIRQAIVDGELMKLVELRCRSHPFLLDGLRRLMEYKE  
DMERLNPSSKKS AFFYTGYESLARSEVPKHLKQLENIKPKNKNLVILPHTRKPYTKYVNREYIKKYTPKI  
PTYYSNTTNTDYSNSDVV VADIPFGI IPLGLDEFYPLAQNESPSI HDLDSKRFIRDI INNYSKKYDNVLI  
HRKVIEKFDITNFNLI EDELQLPEAKISDFNRLNDIADYQFGCGAGNALFGGDEDKITIEKSRKTKKIRH  
VFEDNENIVNMRANDGFLILSDLGAKRLHKFLEYPHNRV VVSEDSEPFALKGKSVFNK FVLDCDENIRRN  
DEVLIVNKDDKLLAFGKALLSSYEIKDFNTGQA I KTRKWKKEIE

>gi|240103198|ref|YP\_002959507.1| 7-cyano-7-deazaguanine tRNA-  
ribosyltransferase [*Thermococcus gammatolerans EJ3*]  
MRGESMEFRFEVKARDAAGRIGKLT VNGKSIETPAIMPVINPKQLIVTPKELEEMGFGMIITNSYIIYKT  
PELKEKALELGIHRLLDYDGIIEVDSGSFQLMRYGEVEVTNREIIEFQEKIGVDIGTFLDIPTPPDAPRE  
KAEEDLRITLERAKEAES IKNIAMNAAVQGSTYPDLRTHAAQELSKMNFEIHP I GAVVPLMESYRYRDLV  
DVVVASKLGLRPDRPVHLFGAGHPMIFALAVAMGVDLFDSASYALYAKDDRYLTPEGTKRLEELEYFPCS  
CPVCSRYTPQELREMPKEERTRL LAIHNLWVIREELNRVKQAIKEGELWRLVDERARSHPKLYSAYKRL  
EYRDYLEKNEPITKASAFFKVSEEAMRWP IVYRAKERAERVAKKFPERIRHPIFGEIPKYL SLSYPFAQS  
EGEEDFTIEKPRKG EARKYVMAVAEYQFGEGAGEAFKDAFVELSRKTGMPRQVKAKGKHLATFRAEDGLL

TLGIEGAKRLHALLPFPKMRVVVNEDAEPFAKRGKNVFAKFVVDADPSIRPYDEVLVVNEKDELLATGQT  
LLNGEELKVFQSGLAVKVRGIEKG

>gi|91772941|ref|YP\_565633.1| 7-cyano-7-deazaguanine tRNA-ribosyltransferase  
[Methanococcoides burtonii DSM 6242]

MSSIFEITHKDAAGRIGKLRTPHGTVETPTVMPVINPNLQVIKPSMRDFGAQMLITNSYIISRDKLRE  
KALKDGLHSLLDGDFGIMTDSGSFQLSVYGDIEVTNEQIIEFQKTIGSDVGVPLDIPTPPDVPRSRAESE  
METTIERLIEARSMVNDEMLLAGPVQGSTYTDLREKCASTISEHKFDVYPLGAVVPLMESYRYAELVDVI  
VSSKKGLDPTVPVHLFGAGHPMMFALAVALGCDLFD SAAYALYAKDRRYITSKGTYHIDNLSYLPCSCPI  
CVSHTAEVVKADNCSDLLARHNLVYTFEELIRLIKQSIKEGNLLELVEMRCRSHPRMLEALKRMYSYSDW  
IEKYDPASKSTFFYCGPESSQRPEVLRFSKRLERFTIKGTAVIRPF SMRTYPESDNDLMFKPPFGTFPAE  
LSEVYPFNAEVIEDTDIESLGKALENTIRLIELNPDAEFTFIKGKELEHPLFEKLEKIADVKE

>gi|21227203|ref|NP\_633125.1| 7-cyano-7-deazaguanine tRNA-ribosyltransferase  
[Methanosarcina mazei Gol]

MSAIFEILDKDAGGRIGKLRTPHGVVETPTVMPVINPNIQLISPKEMRSFGAEILITNSYIIRKEELRT  
VALEKGLHELLGDFGIMTDSGSFQLSVYGSVEVTNEEILGFQEKIGSDIIVPLDIPTPPDVHFRRAEEEE  
LATTAERLEAARKFIQSKQLLAGPVQGSTYPELREKAASHLKDNLNFEVYPLGAVVPLMESYRYAELVDVI  
AASKKGLSPTSPVHLFGAGHPMMFALAVALGCDLFD SAAYALYAKDGRYITSNGTYHLEKLNLYPCSCP  
CSRYTAEELRKAKNKEELLGRHNLATFAEIRLIKQSIKDGKLELVEQRCRAHPKLLDGLKRLYTHSAW  
LEQFDPATKGTFFYCGPESASRPEVLRFGKRLERFSIEGSAIIRTSPVKGEKDYDRILTFKAPFGTFPAE  
MEEVYPFNAEVPKFPDYEALSTSLNNTIKLMDLNPGAFTFICEKEFQHPLIEEIGKKAKLVYREAWKKE

>gi|20093206|ref|NP\_619281.1| 7-cyano-7-deazaguanine tRNA-ribosyltransferase  
[Methanosarcina acetivorans C2A]

MSAIFEILDKDAGGRIGKLRTPHGIVETPTVMPVINPNIQLISPKEMKSFGAEILITNSYIIRKEELRT  
VALEKGLHGLLDFGDFGIMTDSGSFQLSVYGSVEVTNEEILGFQKIGSDIIVPLDIPTPPDVHFRRAEEEE  
LAVTAERLEAARKFIQGEQLLAGPVQGSTYPELREKAASRLRDLNFEVYPLGAVVPLMEAYRYAELVDVI  
AASKKGLSPTSPVHLFGAGHPMMFALAVSLGCDLFD SAAYALYAKDGRYITANGTYHLEKLNLYPCSCP  
CSKYTAEELRKAKNKEELLGKHNLYATFAEIRLIKQSIKDGKLELVEQRCRAHPKLLDGLKRLYTHSAW  
LEQFDPATKGTFFYCGPESSFRPEVLRFEKRLDRFSLEGSAIIRTAPVKGEKDYDRVLTFFKAPFGSFP  
MEEVYPFNAEVPKFPDYETLSTALSNTLKLMELNPGAFTFICEKEFEHPLIEEIGKKAKLVYRAAWKKE

>gi|73668621|ref|YP\_304636.1| 7-cyano-7-deazaguanine tRNA-ribosyltransferase  
[Methanosarcina barkeri str. Fusaro]

MSAIFEILDKDAGGRIGRLRTPHGTVETPTVMPVINPNIQLIPPKEMRNFGAEILITNSYIIRKEELKS  
VALEKGLHGLLDFGDFGIMTDSGSFQLSVYGSVEVTNEEILGFQKIGSDIIVPLDIPTPPDVHYRRAEEEE  
LAITAERLEAARKFIQSEQLLAGPVQGSTYPELREKAASHLKDNLNFEVYPLGAVVPLMEAYRYAELVDVI  
AASKKGLSPASPVHLFGAGHPMMFALAVAMGCDLFD SAAYALYAKDGRYITVNGTYHVEKLNLYPCSCP  
CSKYTAEELKADNREELLGKHNLYATFAEIRLIKQCIKDGKLELVEQRCRAHPKLLDGLKLYTHSSW  
LEQLDPATKGTFFYCGPESSSRPEILRFKRLDRFSLQGSVIIRTGSKVGEKDYDQILTFKAPFGAFPVE

MEEVYPFNAEVPKFPDYESLNTALSNTLKLIDLNPEAEFTFICEEEFKHPLIEEIRKRAKLVYRKDWKKE

>gi|73671775|gb|AAZ80293.1| archaeosine tRNA-guanine transglycosylase catalytic subunit [Methanosarcina barkeri]

MSAIFEILDKDGGRIGRLRTPHGTVETPTVMPVINPNIQLIPPKEMRNFGAEILITNSYIIYRKEELKS  
VALEKGLHGLLGFDPIMTDSGSFQLSVYGSVEVTNEEILGFQQKIGSDIIVPLDIPTPPDVHYRRAEEE  
LAITAERLEAARKFIQGEQLLAGPVQGSTYPELREKAASHLKDNLNFVYPLGAVVPLMEAYRYAELVDVI  
AASKKGLSPASPVHLFGAGHPMMFALAVAMGCDLFD SAAYALYAKDGRYITVNGTYHIEKLNLYPCSCPV  
CSRYTAEELKKADNREELLGKHNLYATFAEIRLVKQCIKDGKLELVEQRCRAHPKLLDGLKKLYTHSSW  
LEQLDPATKGTFFYCGPESSSRPEVLRFGKRLDRFSLQGSVIIRTGPVKGEKDYDQILTFKAPFGAFPVE  
MEEVYPFNAEVPKFPDYESLNSALSNTLKLIDLNPEAEFTFICEEEFKHPLIEEIRKRAKLVYRKDWKKE

>gi|116754948|ref|YP\_844066.1| 7-cyano-7-deazaguanine tRNA-ribosyltransferase [Methanosaeta thermophila PT]

MQGCFEILHKDLAGRIGRLHTPHGIVETPALMPVVNPHVLLLSPQELADLGAEMIITNSYIIHQDPVLRD  
TALERGVHGLLNFDGPMVMTDSGAFQLSVYGSVDIEPLEILKFQQKIRSDVSVPLDIPTAPDAPREQAERE  
LAETERRLREAVDHRSESLLLAGPVQGGIYPDRESSARRLRDLGFDLYPIGAVVPLMESYRFRELVDVV  
VASKTGLGPGVPVHLFGAGHPMVFALAAALGCDLFD SAAYALYARDGRYLTPRGTYRLSEMKYLPSCSDV  
CRKHTPESLNEDPKRVELLARHNLAVSFQEI RAVRQSIHEGSLWEHLERRCRSHPRMYQAFKHL SRYVEY  
FERLDRVSKSTLFYLS TESARRPEVLR YRKRICRLELRGRVLTDRRPAEEDRSKYDHILGFLPPFGPYP  
LGLEEMYPLNAELPDEM DENAMKEALDTLRL LIRENPDAEFHFEIRCLEGHRDAVL

>gi|55379810|ref|YP\_137660.1| 7-cyano-7-deazaguanine tRNA-ribosyltransferase [Haloarcula marismortui ATCC 43049]

MTNFEVRQYDAAGRLGELTVPRAGVTVETPTILPVVNPVHVQTVAPATLASEFGAEILITNSYILHGSDDL  
REPVLEQGLHDLLGFDGAIMTDSGSFQLAEYGDIDVTTEEIILEFQHEIGSDIGTPVDIPTPPDVDRERAT  
EELKTTQERLEHAATVDTGEMLV SAPVQGATYPDLRERAAADAVSTGLDVFPLGAVVPLMNEYRYADLAD  
VVAACKRGLGEVGPVHLFGAGHPMMFAMAAALGCDLFD SAAYALYARDDRYLTVQGTELLDELSYFPCHC  
PVCTDHTPAELDAMDADAREELLARHNLHVTYGEIRTVKQAIRSGNLMELVDSRARGHPEMLDGYRALLD  
HSEQLERTDPVSKDAFFYTSTESARRPEVRRHQDRLERLPVEGEEVLLTEGSSSAQYDESWGVLPPFGPY  
PRELADTYPLTAETPDRTDRAAYEAAATGVRRLVELHPDVSFTLVHDDWPATALDRVPEGVRLRDLHARD

>gi|88602410|ref|YP\_502588.1| 7-cyano-7-deazaguanine tRNA-ribosyltransferase [Methanospirillum hungatei JF-1]

MTLSFEILEKDIAGRIGKLSGQKIVKTPTLLPVINPHLNLIPPKEMQEMGVEAVITNAYIFSRSEEYRE  
RALTDGLAKTLDFDGVIMTDSGSFQLSVYGEVEITNAQTIAFQQAIKSDIIVPLDIPTHSPREQVEQE  
LSVTMDRIMEAKDIADHEHHTLAGPVQGGFLPDLREETGRRLSEAGFRFCPIGAVVPLMESYRYAELVKV  
VMAAKRGLSPAVCVHLFGAGHP SMFALAVAMGCDLFD SAAYALYAKDGRYMTTHGSYHLNELSYLPCPCP  
VCVGHTAKELNESPDRELLAMHNLRVSLAEINRVRQAIRDGVLWELVDERC SRSHPALLRGYRTLLGYNE  
ELTALDRETKRRFFYRGDESKRTEVVRYHQMVGRLTAGERTLISFSRHIKKKQTEEYDSVFYFKPPFGP  
FPAELTETFPIGQSEIPDFDEEMIKTGCIGIARLMETNPDSHFTIRCRPVWKDLITQILPTVEVQDEGS

>gi|76801897|ref|YP\_326905.1| 7-cyano-7-deazaguanine tRNA-ribosyltransferase  
[Natronomonas pharaonis DSM 2160]

MRDIFERRDGDAAGRIGELSVPRAGTTVETPALLPVVNPHERTIAPAELESTFGAQILITNGYILYGSDE  
YRERALADGLHDLDFDMSGAIMTDSGSFQLSEYGEISVTNEEILRFQRDIGSDIGTPVDIPTPPEASREQT  
AADLETTKARLEAAETVDTGEMLVNAPVQGGTYPDLREEAAEHAYGTTLDVFPVGAVVPLMNSYRYGDMI  
EAILGAKRGLGADAPVHLFGAGHPMMFALAVAAGCDLFDAAAYALYARDDRYLTVAGTDHLLDLEYLPCS  
CPVCADHTPAELQAEDDTERERLLARHNLHVSFQELRTIKQAIKKGNNLELVERRARGHPAMVDGYRALL  
EADQLERDDPVSKGSFFYLSGESARRPEVKRHHDRLSRLSVDGDRVLLSEGGDNSRFDETWRLQPPFGP  
FPPALSDSYPLTAELPERLDDRAYEAAAAGVRRLLVDDHPETEFVAHVHGWPDAAALDSLDPDGVELLRLGAD  
SDHPPERDSAQSDMDGDEPKEDYPPGEDENA

>gi|126179234|ref|YP\_001047199.1| 7-cyano-7-deazaguanine tRNA-  
ribosyltransferase [Methanoculleus marisnigri JR1]

MAITFEVIHKDIAGRVGKLRVNDKTVRTPALLPVVNPPLVTPREMREMGVEALITNAYIFRRSTEFHD  
RALAEGLHGVLDLFDGVIIMTDSGSFQLSVYGEVEVSNRDTLEFQQAIKSDIVVPLDLPTPPDAGPGRARE  
LAVTMERIREAQALFPDANLAAPVQGGIFTDLREEAGRAVRDLDFTFAPIGAVVPLMESYRYKELVQVVL  
AAKRGLSPGTAVHLFGAGHPSMFALAVAMGCDLFDAAAYALFAREGRYITPHGSLKIDELAEALPCACRVC  
RSMTADELRKSEDRERLLALHNLHVTLAEIARIRQAIQDGTLLWELVDERCRSHPRLLDGYRELLAHVAEL  
ERDDPVSKRRFFYRGSETCRRETVLRFHEVIPRIPLGERVLVSFDGQGAPGFDTVLNFKPPFGPYVELA  
ETFPVQSEVPEWDDDMVRS GCAGIRSLMEAHPE SRFTVQCGEVWTRLVLEEVPAEVLHEQV

>gi|124486027|ref|YP\_001030643.1| 7-cyano-7-deazaguanine tRNA-  
ribosyltransferase [Methanocorpusculum labreanum Z]

MAITFEVIHKDIAGRVGKLGKAGDKAIRTPALLPVVNPPLQIIPPSEMKKMGVEGIITNAYIFSKSEEFRG  
PALEKGLHEVLDFDGLIMTDSGSFQMSVYGSVDITNEQTLFSQRDIGSDI WVPLDIPHPDTERDEVIAQ  
MEITMARMKEAKELFGDDAPISGPVQGVAFEDLREYAGKTVSDMGFAYCPVGAVVPLMESYRYRELVDVI  
LAAKGLNPGACVHLFGAGHPSMFALAAALGCDVFDAAAYALYAKEGRYITTYGTLKLDENSELPCACPV  
CRSHTVEELKKS PDKQKLLAYHNLAVTMAEISRIIRAAIQDGTLLWELVDERCRAHPKLLDGYRLLERVEE  
IEHLDRASKRRFFYRGSESCRREVTNYHAMIPRVKLSDVSLIAAGGPVPSRFEEVIEFKPPFGPLPYEL  
AETFPAGPAEVPTWDEEMMKYGIKGLKGLLATNPDTKVTISTTAKWADLFRAEFPAAEVIT

>gi|15790835|ref|NP\_280659.1| 7-cyano-7-deazaguanine tRNA-ribosyltransferase  
[Halobacterium sp. NRC-1]

MRDVFEVGAQDGLARIGELDVPRAGVTVETPTLMPVVNPNLITVEPSRFVDFGAELLITNSYIINSDDD  
LRERALDEGLHEMLGFDGAIMTDSGSFQLAEYGEIDTDTEAILRFQHDIGSDIGTPVDIPTPPDADREQA  
AAELETQQRLELAETVDVGDMLVNAPVQGATQPDRLREQAGAHAYGTALDLFPVGAVVPLMNQYRYDDMT  
EAVLAAKRGLGRDAPVHLFGAGHPMMFALAAALGCDLFDAAAYAIYARDDRYLTVSGTEHLDDLHYFPCD  
CPVCAEHSPQAVRGMAAGDRERLLAEHNLHVSFGEIRRVKQAIKSGTLMELVAARAHHPSTLDGYRALL  
DHSDQLEASDPASKDAFFYTGAGSARRPEVHRHHQRLDRLDVDGDDVLLTEGDSNHRYDESWNVLPFGP  
YPSALATTYPLTAETPARMDRAGYAAAEGVCRLAEANPDFTAFTLAHDDWPESALEAVPQRVSLYNAVRG  
E

>gi|11498196|ref|NP\_069422.1| 7-cyano-7-deazaguanine tRNA-ribosyltransferase [Archaeoglobus fulgidus DSM 4304]

MQRFEILDKAMDGRICRIETPHGRIETPTILPVINPNIPFIRAEEMKKFGAQAVITNSYIIYRSMREEAL  
EKGVHGILETDMPVMTDSGSYQLMVYGDVEIKNAEIVEFQRHIGSDIIVPLDIPTPPDADYATAESDLRI  
TLEREREAKELLKGAENLLAVPVQGSTHPDLRRFAAGEARKIGGDIYPIGAVVPLMDAYRFRDLARVILE  
VRSALPVEPIHFLGCGHPMLFAMAVALGCDLFDSDAAYALYAKDDRYLTVYGTKKLSELYNFPCKCPVCSN  
HDPEELRRMEKNERERLIAEHNLYVSFQEIETIKQAIKENSLELVEKRVRAHPNMLAGWRQVKHYWELL  
EKADPKMKRKFLYTGIDSLYRPAVRRHVKAIKNVELPEEVLVSTDFGIYANIYLRPVFGPVAEMLETYP  
AGHAEIPEEDVVEEALKAASEALMELMNSHPEKRFKVYVSKVWVKHLQNLPPNGELNVL

>gi|154150856|ref|YP\_001404474.1| 7-cyano-7-deazaguanine tRNA-ribosyltransferase [Candidatus Methanoregula boonei 6A8]

MAITFESLDSDIAGRTGKLGAGKRIIKTPALLPVINPHLMLVTPKELRAMGVEALITNAYIFSQSRQYSE  
RVKEEGLHKLDFDGLIMTDSGSFQLSVYGVQVSFTNKQTLQYQDIDIGSDIIVPLDIPTSPDADRPTTERE  
LAITMERLREAKELFGNDAPLAGPVQGGIFPDLRERAGKEVGDGFSFCPIGAVVPLMESYRYRELVDVV  
MAAKSTIPRSACVHLFGAGHPAMFALAAAMGCDLFDSDAAYALYAKDGRYLTTGHSFRIDELTDLPCACAV  
CRSHTAEELCTAKDRTRLLALHNLAVTLAEISRIRQAIADGTLWELVDERCRTHPQLLSGYRRLLSHAAD  
LELYDRASKRRFFYRGDESCARTEVLRVYQRQLDRLRLGKTVLVACDGKEREYDDVLFKPPFGPYPPAL  
KETFPIGPAEIPWDEAMVRQGCGRGIRMLAESHKESRIMVSGLLNWEEIFTQEAGDAAELVR

>gi|119719273|ref|YP\_919768.1| tRNA-guanine transglycosylases, various specificities [Thermofilum pendens Hrk 5]

MVWSEVFEIKEVDLLGRIGSISTRGNVETPTLTPVINPSKPVLEPREIQQMGNLIMTNSYIIKRQYGD  
LAKEVKVHQLLGVDTPVMTDSGAYQLMVYGRVEVDPLEIVRFQVEIGSDIGVILDIPTKKGVPRGQVLAE  
VEETLRRAEASLAVERDGMMLLVGPVQGGLYTDIVATAARRLGEMPFVYAVGGPTQLMEEYDFSELVKLV  
MTARLNLWPWEAPLHLFGAGHPVMLPLAVAMGVDTFDSASYVLYARDRVFTSRGTLRLGEVEELPCNCPV  
CSKYSARELRELPKQERVVLLARHNLVYIQKELKEIREAIEHGRWLWELLEERSMTHPSLRDALRVFARYA  
EYIAKRHPVTRSPVQGLFFYSGLSRYRPEVVRHVNRLAQRYKRARDTLVVFEEETPQKPFTRAGLVKEILG  
ADPMLPVDVDVAVLSGAFSVIPLELDGFYPLSQYEASGEVFREAVDEVLADLAWFVLSKGYRRVVLVYHS  
LPKVFLDKLKERLSLEGVLLAYVEVENYDEALLNPSAVAGRIRSMISFLESIA

>gi|15920526|ref|NP\_376195.1| 7-cyano-7-deazaguanine tRNA-ribosyltransferase [Sulfolobus tokodaii str. 7]

MVGEFEIKDEDLAGRIGIIEKSGKLETPVFFPVINPFKSEISIKDIENLGFKNLITNAYLIKKITNTKI  
QDIHSFLQFNGVIMTDSGAYQILQYGNIEVTNREIVEYERDINTDIAVYLDLPTGDTNSRDEAINSVKIT  
LERAKEIEDIVKNDSEIRIWHPIQGGRFDLVEYSAIEADKNEAFKMLALGSPTVVMKEYDYSLIDMVF  
IAKSNVSRGKPFHLFGGGLPHIMPLVIALGVDSFDSASYILYARDNRYITRSRVYRLEELEYFPCSCPIC  
LKYPKELLELPKEERTKLLALHNLVYIKEELNAIKQAIREGRLFYIIEKAYSHPAVYSFAFKKILKYKD  
YLEKYDPRVKGNIRGIFLFDLKSINRPEIVRHYNFLDRINKNNDKAIIECEKRENILKKVKNNEVDIYL  
FNPFGYGLIPINLIEVYPYFQTEYPEEIDEDVLRVIESKIVEFVRSKGYTKIDFIGCEKYLSHINSIGAFF

S

>gi|70606466|ref|YP\_255336.1| 7-cyano-7-deazaguanine tRNA-ribosyltransferase  
[Sulfolobus acidocaldarius DSM 639]

MIGDFEIKDEDLGRIGILETKHGKLETPAFFPVINPVKNEITIQDILSVGFESIITNAFLIKKYIGKEE  
DLHSILNYNKILMTDSGAYQILQYGDIDVSNVDIVNYETKLPDIAVILDIPTGLTEDKKEAEKSVESTI  
SRAKEASKFVELSKDEI IWVHPIQGGMYLDLIEYSARIADMNQDYKMLALGSPTVLMQRYEYAPLIDMIY  
KSKSNVSRGKPFHFLFGGGHPHIFAFVAVALGVDTFDSASYILYARDHRYMTRERVYRLEELDYPFCSCPIC  
SRYSKPKDVMEMPEEQKVR LIALHNLVIKKEEINYIKQSLKEGRLFEYIQQKAYSHPSTFEAFRRILNYSK  
YLEKYDPRVKGEVKGVFLFDNSSLHRPEVIRHAYTLSKIKQRSKALVLYCSDSKDNPLKNTEDMKNADVY  
IVLPFYGCVPYNVFFTYPYFQSEMPSTIDKDVIIYDLKNKLKEFLSQRSYETVSIIGCEKILHVDSIRGAP  
VNLLLNLK

>gi|124027358|ref|YP\_001012678.1| 7-cyano-7-deazaguanine tRNA-  
ribosyltransferase [Hyperthermus butylicus DSM 5456]

MKREIGVFEIREKDLGRIARLYTPHGVLETPALLPVIDPVRQEVPLVEIKRLGFNAVITNAYLLWKRLG  
EQAAEKGVHGVLFEGIVMTDSGAYQLLEYGHVEVEPREIVEYEKIGSDIAVILDVPTGNTRDRKQAE  
SVRETLRRAEEAQSYIDPDKRIWTLPIQGGPFIDLVRESAEKARKLKDYKLYALGSPTVLLERYEYSTLL  
DMVFTARFSLPVTRPLHLFGAGHPMIIPFAVALGVMDFDSASYILYARDNRYMTLTKTYRLENLEYFPCS  
CPVCSRYTPQELREMPRDERVKLLALHNLVLRQAINEVKTAIREGRLWELLEERSRAHPSLATAFAKFR  
QYIEKIEQLAPRVKTGFVRGLLLYGSSELYNPRVVAYRRSIRINYKPRIRGELKLIPVSPFEKPFSTSSKL  
YRSIKKGRDIHVVGMYLYLGP IPEELAETYPGSQFEVNLTPYWEVVEETARSIAEYVEANKANYTSIEI  
YYCQGDGLKWSRPVAEKTTELLRKRGVKLAELGEC

>gi|161529044|ref|YP\_001582870.1| tRNA-guanine transglycosylase  
[Nitrosopumilus maritimus SCM1]

MKIYLF EISKTDLAGRIGTIDTNHGKIETPAYVPVIHPVKQTIPSKKIKEIGFDLVITNAYITRNNYGDK  
AVKKGIIHKIIDYDRGIMTDSGGYQVLEYGDPVPAPTEMA EFEQGIMTDFAIPLDKPTGFGLPIKKA EAYV  
KHTLVCKQTIEDSKDNGQIWIWPIQGGHEFDLVAKSTKGLIKMGYKMLALGSPVEFMESYEYRLLAQMI  
IAAKKQIPHNIPLHLFGAGHPLTIPFAVALGCDTFDSASYMLYAKQNR YITEDGTRDLSDIVVFPCNCEI  
CTKYTPDEL RQLESIEKINQIAIHNLHAIKLEVDKVKQAIHEGRLWEYVIKKARAHPKLFEMVEVMTENS  
EFLKIGTPKFKERAIFLFDKEDQFRPEVQVFHEIVRGFKSKKEKILITNESSTKPGYLSHQFVNLSKLLK  
DFEEVQICQYNPQLGLPIEISDIFPAAHHETSRMNFDPKEFTEFEKTWKIFFENK FSEIRYNKDDEFL  
KYFVKTLPKNIKKKSFL

>gi|41614920|ref|NP\_963418.1| hypothetical protein NEQ124 [Nanoarchaeum  
equitans Kin4-M]

MFLYMKIKFEIKYKDAAGKVGKIKLNGKTIETPYLFPVINPQELPIKEIKKMGFNAIITNAYILFKRK  
EEVMEKGIHNLFGFDGIIETDSGAYQLLQYGDIDIENEDIYFQNEIGVDIGNILDIPSYGKTYEEAKKD  
LEITLERLQAIEMANFAINGPIQGDKYLDLRYKALEEVSKLDDIDIYAIGGIVPYMNQYKIESLAKIIGP  
LLLDIPRDRPVHLFGLGHPLIMPLFVALGADLFDASYSLFAKEERILTPFRTRFLEDLTD SYILDYKAS  
ELKGMENKTYIIAKHNLLVLRNEINFIRDLIRQNRLWDYVIIKAHAHPSIYFATKYVLENLYEKLKEHEP

ITKRVGILYQGELTELRSDLRYAIEQLKKLDKSQINDILDYAWPFGQFEIGEKKKLFQRFK  
>gi|156937272|ref|YP\_001435068.1| tRNA-guanine transglycosylase, various  
specificities [*Ignicoccus hospitalis* KIN4/I]

MIWEPEARDDGPARAGKLVGAYEVETPALLAVVDPDPKKQLVPLDEMRRAGVQVIMTSAFIAKKKVGPTN  
LKERLGWEGLLYTDSGTFQAYSRGVRVDPEESVRYQISAGSDIITPVDLFSLPTDSKEVAAKKAEVSFRR  
WLRARELKEEVSAPVQGGLYPDVRAAVARRYSEAGARLLAVGGIVPLMEEYKFKELVNAVLPVLASRPPE  
AAVHAFGAGHPLAFPLLAFLGVDLFDSDAMYAIAAREGRYLTFFGTFRLEELVMMREFPCDCPACSSLSR  
DLLSMSEEERTKFLALHNLAAIKMVKEIRERIVYGTFFHKWAIATAHSHPRLYEAFAEALGKWRGYFERE  
RNALPKSPVPEGCELCDSSEPERDPVGEPTYGTRELFNVIKRAYGKGLSSEEPLEALRPPRASFSRPRALR  
ELCSVTLNSPKGRAIRKKDLKEVNCLLRPNHEVLVLWEGGEAKAVSLVSFAELSLASEEAVALLLPEP  
LHGKVLGGLVGRVEAGDHGG

>gi|292656129|ref|YP\_003536026.1| queuine/archaeosine tRNA-ribosyltransferase  
[*Haloferax volcanii* DS2]

MRDHFELRDGDLGRIGRLSVPRAGVTVETPALLPVVNPNIIDTISPARLESEFGAEILITNSYIIKTNDH  
LREEALDVGLHEMLDFDGAIMTDSGSFQLAEYGEIDTTTEEILQFQRDIGTDIATPVDIPTPPDVAREQA  
EADLEITRQALADAEAAADTGEMLVNAPVQGSTYPLDREEAGRHADATDLDFVPVGAVVPMNAYRYDDMV  
DAVAAAKRGLGVDAPVHLFGAGHPMMLALAVALGCDLFDSDAAYALYARDGRYLTVRGTEHLEDLDYLPCT  
CPICTEYSPDDLREKGSKRQEQLLAEHNLHVTFEALRRIKQAIRDGDLMELVEERARSHPAMLDGYRALL  
AHVDQLEREDPASKGAFFYASNESAHRPEVARHHARMRLTAEGHVLLTEGGVPSGDDFDATWRVPPFG  
PFPRSLSETYPLTAEVPERLDRDAYEQAARGVSRLVEENPDAAFTLAHDDWPESALARVPESVELESLSA  
VSERLGDEASVGGDDGDDGGSASSAE

>gi|118576825|ref|YP\_876568.1| queuine/archaeosine tRNA-ribosyltransferase  
[*Cenarchaeum symbiosum* A]

MTFEIFKCDLGGRIGSIQTSRGTVETPAFVPIHPVRQGI PAAKIQDMGFNLVITNAYIAMKNHGEEAVR  
RGIHGIIGFDGPMVMTDSGGYQVLEYGDVDTDPAAMARFEEGIGSDIAVPLDRPTGIGLSRKRAGELVRHT  
LRVSKETLENSSSGGPLWAGPIQGSEHLDLVRSSAKALTGYGFRMMALGSPVEFMESYEYGPLAGMIAAAR  
ESIPDSVPLHLFGAGHPLTIPLAISLGCDFDSASYILYARQGRYITEDGTRRIKEMGYLSCSCEVCSKY  
TAPELAGAKDKERIDGIALHNLHAIKSEVDRVKEAIEHGRLEWYTMKKMRAHPRLFESARILEQNGARFI  
RTTPRFKSRVFLFGPEDQYRPEVISYHNMAREYTTTRKKILCITRDAQIKPAYLSPQYSTLKARFIDPGK  
VQFCQYNPVLGIIIPVEISDIFPAAHYVYGGRAEPGDFAEFAITWDAFLARNKFAEIHYEKTDPFISHFIK  
RAKGARRLALKSRKRKNT

### **ArcTGT from crenarcheota that don't have ArcS:**

>gi|14601784|ref|NP\_148325.1| 7-cyano-7-deazaguanine tRNA-ribosyltransferase  
[*Aeropyrum pernix* K1]

MFEIRDVDLAGRIGRIYTOHGVVETPAFFPVIDVYRQEVSVDEVRAAGFGQVITNAYLLWKRFGWEEAAEK  
GVHRILGFPVMTDSGAYQILEYGGVELSQGEVVEYQKRLGSDIAVILDIPTGDVGRREAEESVRETIR  
RALEARVMIEGDERIWIYPVQGGRYFDLVEESARVGGRLGFYRMYGIGSPTVFLERYMYHVVEAVYRAK

KHLPWGRPVHLFGAGHPLIFPYAVALGVDTFDSASYILYAREGRYITEYGVYRIEDLDYLPCSCPVCSRY  
TPQELREMDRVERTRLLALHNLYVISASMRRVKQAIREGRLWELLEETSARKHPSTARVMARMRYIDALE  
KGSARGRGVVRGVRAYGLESLSNPRLSRFSSDAARLVEAMAEEKWGGGKAVLKPLDPKPEPGQCESMVG  
EWILFYQPFLGVFPVEACGAYPSLQIDYPQEGLPAEVIIGDLASKIASTVSI LRGRGFTVRLEYCGKVEWQ  
ARAVEALKTAAAGDLPTVEACG

>gi|70606466|ref|YP\_255336.1| 7-cyano-7-deazaguanine tRNA-ribosyltransferase  
[Sulfolobus acidocaldarius DSM 639]

MIGDFEIKDEDLAGRIGILETKHGKLETPAFFPVINPVKNEITI QDILSVGFESIITNAFLIKKYIGKEE  
DLHSILNYNKILMTDSGAYQILQYGDIDVSNVDIVNYETKLPDIAVILDIPTGLTEDKKEAEKSVESTI  
SRAKEASKFVELSKDEI IWVHPIQGGMYLDLIEYSARIADMNQDYKMLALGSPTVLMQRYEYAPLIDMIY  
KSKSNVSRGKPFHFLGGGHPHIFAFVAVALGVDTFDSASYILYARDHRYMTRERVYRLEELDYPFCSCPIC  
SRYSKPKDVMEMPEEQVRLIALHNLYVIKKEEINYIKQSLKEGRLFEYIQQKAYSHPSTFEAFRRILNYSK  
YLEKYDPRVKGEVKGVFLFDNSSLHRPEVIRHAYTSLKIKQRSKALVLYCSDSKDNPLKNTEDMKNADV  
IVLPFYGCVPYNVFFTYPFYQSEMPSTIDKDVYDLKKNLKEFLSQRSYETVSIIGCEKILHVDSIRGAP  
VNLLLNKL

>gi|227828119|ref|YP\_002829899.1| 7-cyano-7-deazaguanine tRNA-  
ribosyltransferase [Sulfolobus islandicus M.14.25]

MTVFEVKYEDLAGRIGILKTRSGNLETPVFFPVINILKDEISIDEIKNMGFKNFITNSYILYKNKYIKDD  
IHKELNSEDMIIMTDSGAYQILEYGDIGITNYEIVNYQLKIKPDIGVILDLPTGNTNDYENAKITVYETL  
KRIEEEASKIIVKNQDNNI IWVYPIQGGKYL DLVKTSAEGLSKFEDIYNMVALGSPTVLLERYMYDTVIDM  
IYTAKSNIKRGIPFHLFGGGLPHIIPFAVALGVDSFDSASYI IYARDNRYITRTRVYKLEDLEYFPCSCP  
ICSKYTPKDLLEMNEEERTRALAIHNLYTILEEFKATKQAIKEGRLFEYLQEKAYSHPAVYSAFKRLIKY  
KDYLEKYDPRIRGDPKGLFLFDNSSLHRPEIIRHSRFLERYVQKKDKVAICYDKAISDTAYDYIKSIKE  
RITDHNSSDIFIAIPFFGLIPLEVSDSYPLSQFEIPNEIDEDVIADMKTKIVSFLRCKNYQKVELVNCEK  
LGLHIDSISTSS

>gi|126465809|ref|YP\_001040918.1| 7-cyano-7-deazaguanine tRNA-  
ribosyltransferase [Staphylothermus marinus F1]

MEYYDPRDYDLAGRIARLKTRHGVIETPYLFPVNVPLRQQPSIEKLYELGFNAFITNAYLFYRRNKGEIR  
NIHEALGWNHVMITDSGGYQILVYGSVEIDNKTIVEYEKIGVDIGVILDIPTGTRMSWGEAREAVFETY  
KRAVEALPLIMSDQLWVLP IQGSPYKDLLIYSSIKAWTLPYHIHALGSPTVLLKDYDYEKIVELTAIAR  
IHLPPHKPLHVFVGHPMIIPFLVALGADLFDASASYILYARDNRYMTETGTRLEELQYLPCNCPVCSRY  
SVKELLEMPRYKRIELLALHNLYMLKKELNNTKQAIKEGRLWEYLEYKSKAHPSLRKAFNILKKYLEYIK  
KYNPATKGTTLALLLNDSDSLINPRLSLTKENTKEYILKKYRGKQILLPAIEKPFNQEKTYLRTKKQYK  
GYEILFYHPFLGVFPQLSNTYPPFQHEVGVINENVIENLVNELKKVILEINPEKIVLVKIGMKPYDDII  
DELLKDKNLVSTYTL DVLSLSA

>gi|146305018|ref|YP\_001192334.1| 7-cyano-7-deazaguanine tRNA-  
ribosyltransferase [Metallosphaera sedula DSM 5348]



MIGDFEVKDEDLAGRIGILETKHGKLETPVFFPVINPLKQEVFLEELKAVGFNNFITNSFILKKNNILQG  
TIHEKFGDNFVIMTDSGAYQILEYGEIEQTNRDIVSFEAKIRPDIAVFLDIPTGNTDDREEAKFSVEMTL  
ERGKEIADIVDQNEIDIWVHPIQGGQFLDLVEYSAREANKRTNYKMLALGSPTVFMKEYKYDTLVDMIYT  
AKSSVSRGVPFHLFGGGVPHIIPFAVALGVDSFDSASYAIFARDNRYLTSERTYRLEDLEYFPCSCPVCS  
RYDPSELLEMKSEERYKLLAIHNLWKIREEVNRVKQAIKEGRLFYEQKAYSHPALYSAFKSILKYSSY  
LEKYDPRVKGNVKGLLLFHDHNSMNRPELLRHSEFMANLKPKNKVIICGDKLGSPPFISDPKVKSIQGRN  
RDYDTFVALPFYGLVPMASEAFPLSQFEIPDIIIDDTTLNETILKIKETLRNKNYAEIKFMECEKSVLSH  
IMSINPTL

>gi|307595970|ref|YP\_003902287.1| tRNA-guanine transglycosylase, various  
specificities [Vulcanisaeta distributa DSM 14429]

MSFEILDKDLAGRIGRLRTRSGVIETPALFPVINPVKQVVPLSDIADIGFNQVITNAYLLKRHYGDLVRE  
VGVHKLNLNWDKPIMTDSGAYQLLMYGRVEVSPDEILKYEIDIGTDIGVILDIPTQWGRPKEAVVLEVEET  
LRRARAALTKARIWDPEHRMLIVGPVQGGDKLDILSYSATKMSELNFDIYAIGSPTTLLEEYEFSTIMRM  
IAVVKEKLPKPVHLFGAGHPLILPFVAMGIDLFDSASYVLYARDDRLILRDRTVRLSEVKVDKIPCN  
CPVCRKYTVKELMSMKAERERLLAIHNLVYLWEEIQEIKARIKEGTLWEYLEEKAGGDARVKSALLALR  
RGLRALLKVIPDESGRVRLHITSVESLHRPEVIRHVERLLNNYEPQGCVVMVLPGELLDRPYIRDSL  
YWLIDQLSTSNLLGKVHVVINNPVLGPIPYEISEIYPLSQHEYPEPTPNHMRSLSHYLLRKYLSKLRNRG  
FTDIIIVKESRGKIMNELVNLGFRGVTVLEAGSRQELYSLMPWVIKEVSGIQCGNQM

>gi|119872581|ref|YP\_930588.1| 7-cyano-7-deazaguanine tRNA-ribosyltransferase  
[Pyrobaculum islandicum DSM 4184]

MSFEIVAKDIAGRIGLLYTKSGVVETPALFPVVDPRRQEVPLEVVEKYFNQVITNAYFLYRLTGKKAVDI  
KKLLGWRGVVMTDSGAYQILRYGTVEVDPDEILYFQQKIGSDIGVILDLPFDYEEPYESALLKVEETIRR  
AKRAAVLKDLDMLVVAPIQGALYTDLLIRSAKELSKLGFHIYAIGSPTTLLEEYKFDLILKIVLDVKLN  
MMREAPLHLFGAGHPLVLPFAVALGVDLFDSASYILYARDDRIILRDRTLRLDDVKTEYLPCSTKLCYTP  
VKELREMPKQERMMLIAEHNLAVLREELLEIKQRIYEGTLWEYLEIKARAHPALYRFLKNLHRYRRLLEE  
YDPETHPDPHGLFFFADTASSRPEPMRHWRMSHVSALSCKKAVVIRVNEKPYNRSWEYIYLKGIIGDRAH  
ILFYDPIFGIPEELAEIYPLSQNESEGEDEAARARAYEWLDRYDVIIITYNVDIPLVNKSVIKASSLEEI  
ALYV

>gi|18312172|ref|NP\_558839.1| 7-cyano-7-deazaguanine tRNA-ribosyltransferase  
[Pyrobaculum aerophilum str. IM2]

MSFEIIAKDLAGRVGKLYTKSGVIETPALFPVVDPRKQELPSAVIERYFGQIITNAYFVYRLTGGRAVDI  
KKVLSWNAVLMTDSGAYQILRYGSVEVDPDEILQFQARIGSDIGVILDLPFDYEEPYESALLKVEETIRR  
AKRASAMLDKLEDMLVVGPIQGGLYLDLLATSAREISKLGFHIFAVGSPTTLLEEYRFDLLELVILHVKA  
NILREAPLHLFGAGHPLVLPFAVALGVDLFDSASYILYARDDRIMLRDRTLRLLEDVKTDYLPSTKLCCHK  
PVKELREMPHEERIQLIAEHNLAAILREELLEIKQRIHEGTLWEYLEIKARAHPTLYRFLRSLGRYKRLIE  
EYDPETHPETHGLFFYQDTAESRPEPHRHSRTANLYTPSKVAIVIRAGEKPYNKSWEYRYLKSIVGDRA  
HVLFYDPVFGVLPVEEVAEIYPLSQNEAEGESEAAARAFAYEWLNNDVILLYRVDLPMLSKKVIPLRSLDD  
VLHYI

>gi|171184515|ref|YP\_001793434.1| 7-cyano-7-deazaguanine tRNA-  
ribosyltransferase [Thermoproteus neutrophilus V24Sta]  
MSFEIVAKDLAGRVGLLHTKSGVVETPALFPVVDPRKQEVPLEAVQRYFGQVITNSYFIYRLTGGRAVDV  
KKMLGWGGVMTDSGAYQILRYGTVEVDPDEILRFQOKIGSDIGVILDLPFDYEEPYGSALLKVEETIRR  
AKRAAYLKEMDMLVVAPIQGALYADLLARSARELSRLGFHIFAIGSPTTLLEEYRFDLILRVVLEVKAN  
IAREAPIHLFGAGHPLVLPFAVALGVDLFDSASYILYARDDRIILRDRTLRLDDVKTDYLPKSTKLCYTP  
VKELREMPKQERTLLIAEHNLAVLREELLEIRQRIHEGTLWEYLEIKARAHPTLYRFLKSIDRRLLLEEYD  
PETHDPHGLFFYSDTAPRRPEPARHRERLNNVEPLSRRRAVVIKVEEKPYNRNWQYLYLKKTLGDRAHIL  
FYDPIFGIIPPEEIAEVYPLSQNESEGEDEEARAHAYEWLRRYDLVVLYNVDIPLMGKKVVKARSLEEVAL  
YIQP

>gi|126460752|ref|YP\_001057030.1| 7-cyano-7-deazaguanine tRNA-  
ribosyltransferase [Pyrobaculum calidifontis JCM 11548]  
MGVFEIVAKDLGGRIGRLYTKSGVVETPALFPVVDPRKQEVSEVLKRYFGQVITNSYFIYRLAKGGDVN  
VKRLKWDGVMVMTDSGAYQILRYGTVDVDPDEILLYQHKGISDIGVILDLPFDYEEPYHSALLKVEETLR  
RARRATRLKDLMLVVAPIQGATYLDLLRRSARELSQMGFPIYAVGSPTTLLEEYRFDTILEIVLEAKM  
AMVRDAPLHLFGAGHPLILPFAVALGVDLFDSASYILYARDGRIMLRDRTLRLDDAKSEYLPCSTKLCQT  
PVKELREMPREERTLLIAEHNLAVLREELMEIRQRIHEGTLWEYLEAKARAHPSLYRFLKLSKFRYYIE  
ALDPETHPKPHGLFFYHDTSPSRPEPLRHFTRELVNDPPSKKALVVKASTKPYNRSWEYRYLKVGERV  
HIIFYDPVFGAVPEELADEVYPLSQNEAEGESEEARARLYEWLNRYDEIYTYGVDIPLVGKAVRRLSSIED  
ARYIA

>gi|159040616|ref|YP\_001539868.1| tRNA-guanine transglycosylase [Caldivirga  
maquilingensis IC-167]  
MFEVIEKDEIARIGKLYTRHGVETPALFPVINPSKQYVDLSRIKELGFNQIITNAYIIRKTYGDAAREV  
GLHEIIGWDGPLMTDSGAYQILQYGNIEVSPDEALRYQVEIGSDIGVILDIPTSYPRPRELVEVEVNETI  
RRARRAILQLKELDPEHRMLIVGPTQGGVYRDLLAYSARMVSELPFDIYAIGSPTTLQAYNFTGIIKMI  
LTVKSIIPPGKPVHLFGVGHPLILPLAVALGIDLFDASASYMLYANDDRIILSSRTVRLSELDKDYVLDGC  
GKRAGELMEMSKEERIRLIAQHNLWTLRELMEIKQRIKEHDIWSYVAQKARQHPSVYRAYLTLSSSLF  
RKLTIKLASGLKVNATQLSILDNSDLARPEVQWARRRLRLIKGMGVLTNVLIIGDYEEPFIRTQIANE  
VTRLGVRVFTYNEVYGLIPIELSDVYPFSTVVRVNVKPRPIKYEIRDSVILVEDKYRDLVKFIKCSGECF  
IIYVDSLKNIKAYEKYVGLALMKRVNEGSGIK

#### 4. Supplemental Figures

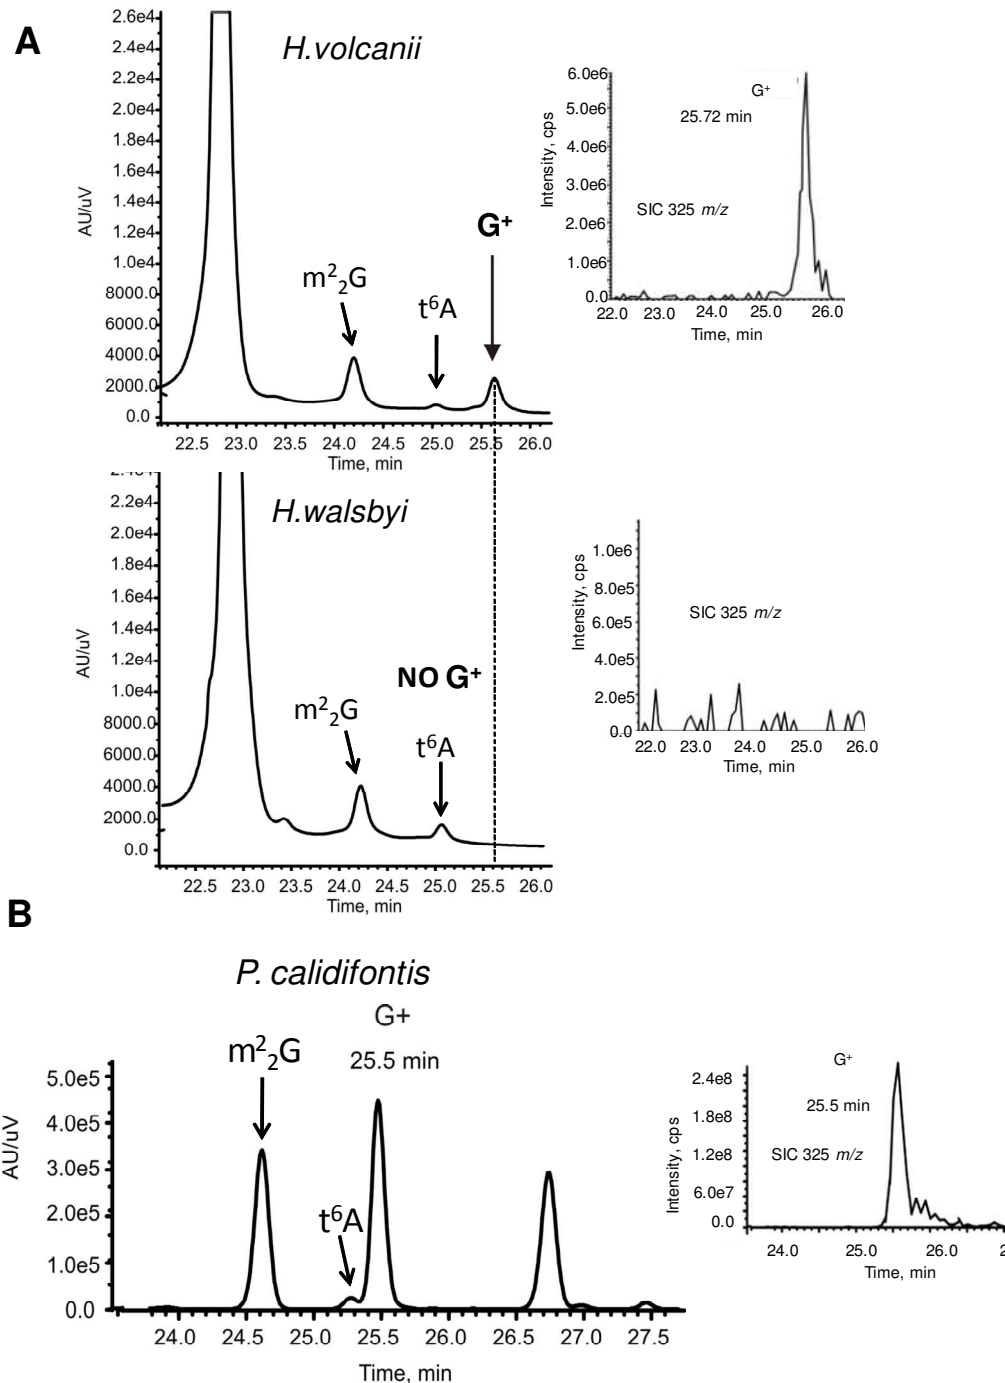

**Supplemental Figure 1.** LC-MS/MS analysis of bulk tRNA extracted from (A) *H. walsbyi* compared to *H. volcanii*; the  $G^+$  peak eluted at 25.7 min in the UV chromatogram (254 nm) of the tRNA extracted from *H. volcanii* was not detected in the UV chromatogram (254 nm) of the bulk tRNA extracted from *H. walsbyi*. The extraction ion chromatograms for 325  $m/z$  are shown in the insets. (B) *P. calidifontis*. The UV traces at 254 nm and the extraction ion chromatograms (insets) for 325  $m/z$  are shown. The  $G^+$  peak elutes at 25.5 minutes. As internal standards, the  $m^2_2G$  and  $t^6A$  peaks are shown.

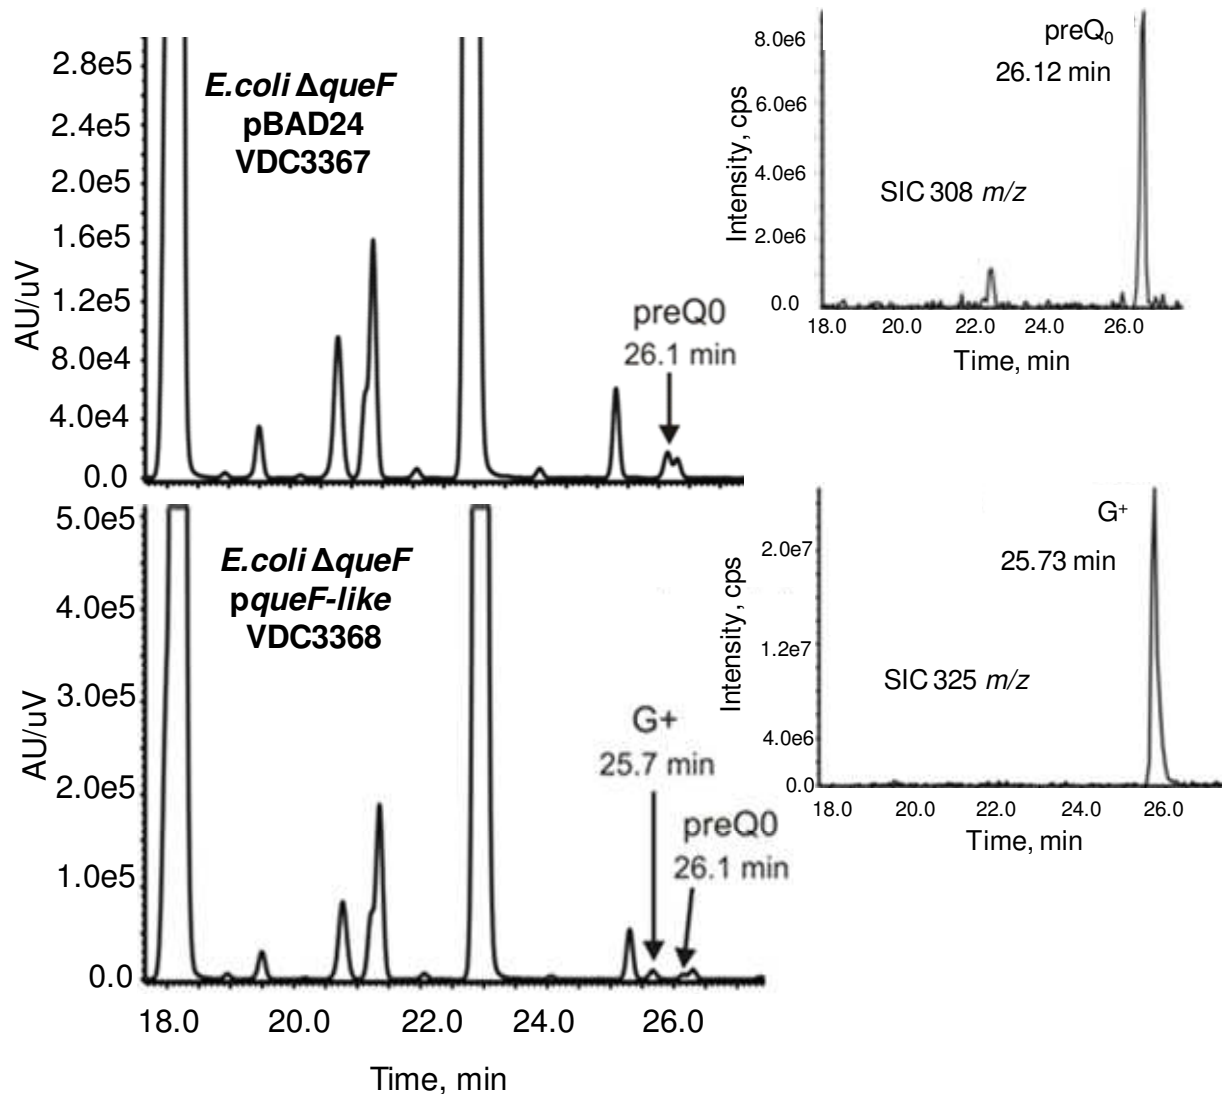

**Supplemental Figure 2.** LC-MS/MS analysis of bulk tRNA extracted from *E. coli*  $\Delta queF$  derivative strains. The UV traces at 254 nm and the extraction ion chromatograms (insets) for 325  $m/z$  are shown. The UV chromatogram of the bulk tRNA extracted from VDC3368 showed the  $G^+$  peak eluted at 25.7 min and preQ<sub>0</sub> peak eluted at 26.1 min. The UV chromatogram of the bulk tRNA extracted from VDC3367 (the negative control) showed only the preQ<sub>0</sub> peak eluted at 26.1 min.

**A**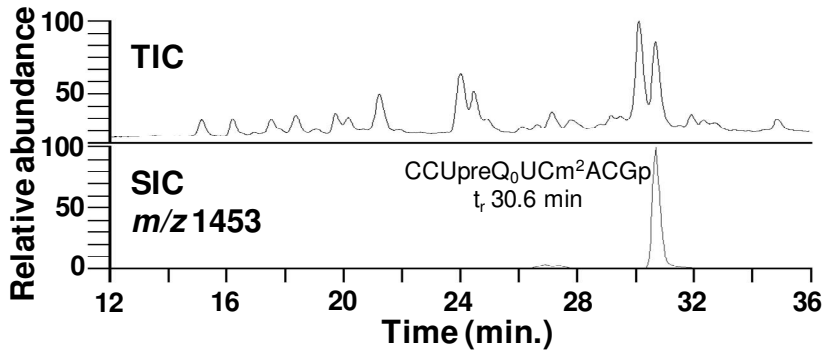**B**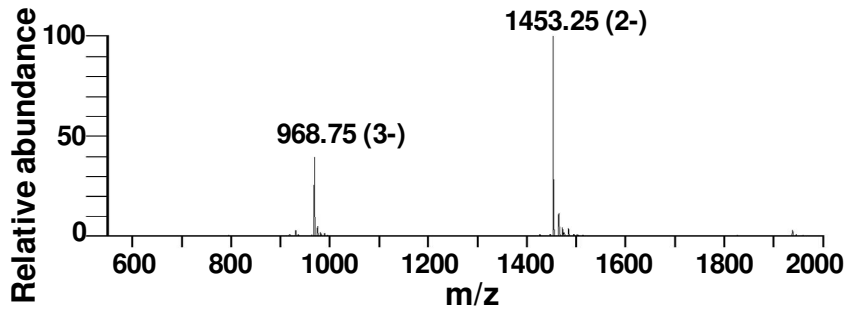

**Supplemental Figure 3.** LC-MS of strain VDC3367 tRNA<sup>Asp</sup> resulted in the identification of one RNase T1 digestion product not expected in wild type tRNA<sup>Asp</sup>. (A) TIC of RNase T1 digested tRNA<sup>Asp</sup> and the SIC for  $m/z$  1453 (2-). (B) Mass spectrum corresponding to the  $m/z$  1453 SIC peak eluting at 30.6 min. These two ions,  $m/z$  1453.25 (2-) and  $m/z$  968.75 (3-), correspond to a molecular ion mass of 2908 Da, which is consistent with an RNase T1 digestion product with the sequence CCUp<sub>re</sub>Q<sub>0</sub>UCm<sup>2</sup>ACGp. The sequence of this RNase T1 product was confirmed by collision-induced dissociation (CID) tandem mass spectrometry (Figure 3D, top).

**A**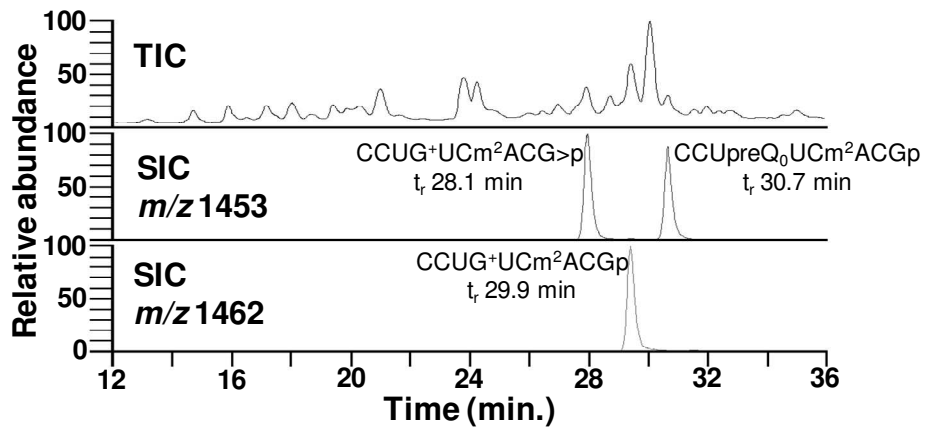**B**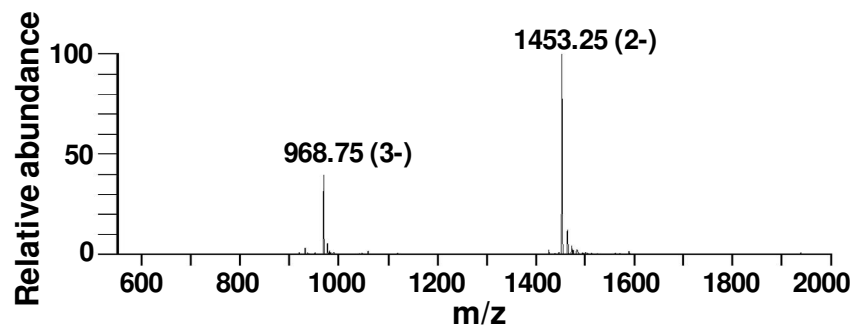**C**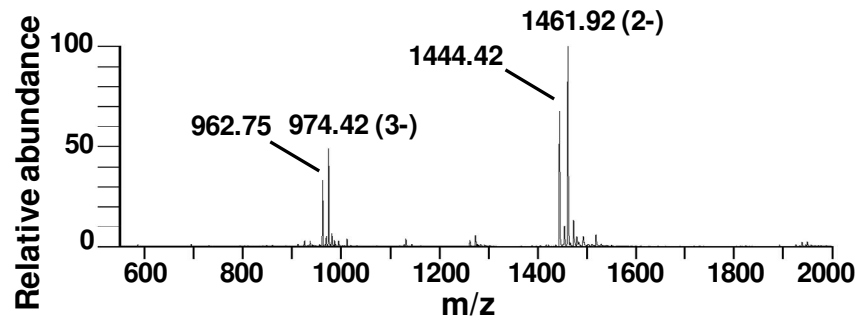

**Supplemental Figure 4.** LC-MS of strain VDC3368 tRNA<sup>Asp</sup> resulted in the identification of three RNase T1 digestion products not found in wild type tRNA<sup>Asp</sup>. (A) TIC of RNase T1 digested tRNA<sup>Asp</sup> and the SICs for *m/z* 1453 (2-) and 1462 (2-). (B) Mass spectrum corresponding to the *m/z* 1453 SIC peak eluting at 30.7 min. The two ions correspond to a molecular ion mass of 2908 Da, which is consistent with an RNase T1 digestion product with the sequence CCUpreQ<sub>0</sub>UCm<sup>2</sup>AGp, as in Supplemental Figure 3. (C) Mass spectrum corresponding to the *m/z* 1462 SIC peak eluting at 29.9 min. The two ions, *m/z* 1461.92 (2-) and *m/z* 974.4 (3-), correspond to a molecular ion mass of 2926 Da, which is consistent with an RNase T1 digestion product with the sequence CCUG<sup>+</sup>UCm<sup>2</sup>AGp. The sequence of this RNase T1 product was confirmed by CID tandem mass spectrometry (Figure 3D, bottom). The peak eluting at 28.1 min in the *m/z* 1453 SIC trace in (A) corresponds to the cyclic phosphate RNase T1 digestion product, CCUG<sup>+</sup>UCm<sup>2</sup>AG>p.

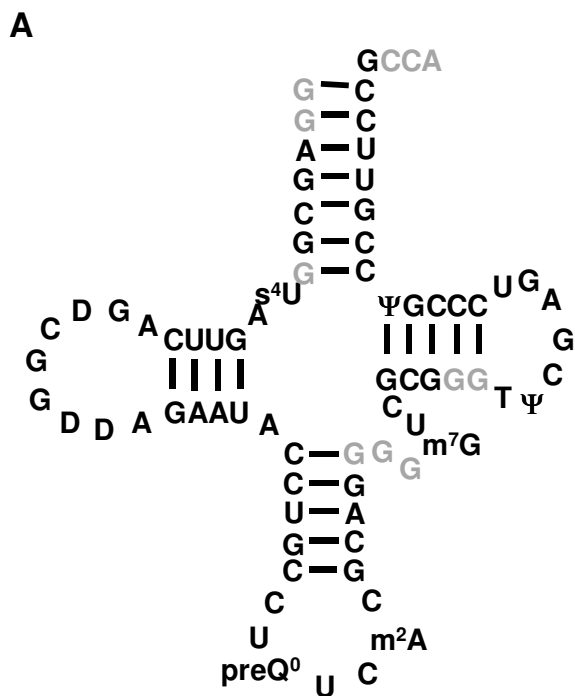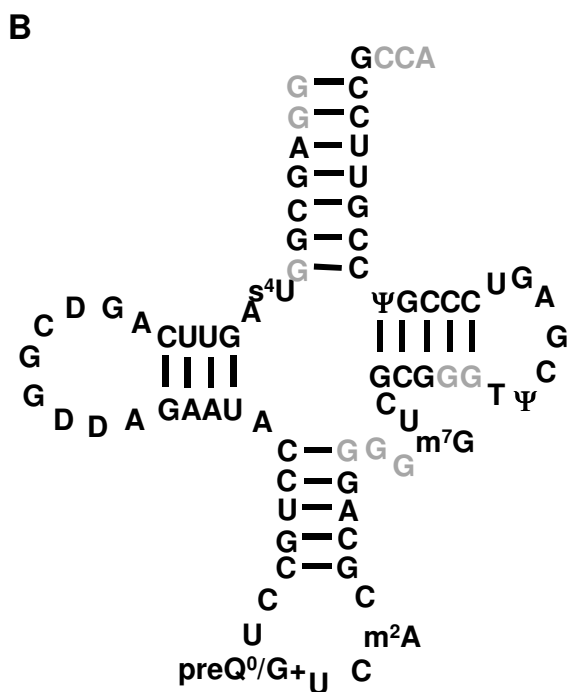

**Supplemental Figure 5.** tRNA sequences of tRNA<sup>Asp</sup> determined by LC-MS/MS from strain (A) VDC3367 and (B) VDC3368. Identified RNase T1 digestion products, including modified nucleosides found in wild type tRNA<sup>Asp</sup>, are depicted in bold type. Regions of the tRNA that could not be sequenced by LC-MS/MS, primarily single Gp residues, are in gray. In strain VDC3367 only preQ<sub>0</sub> was found at the wobble position whereas in VDC3368 digestion products with both preQ<sub>0</sub> and G<sup>+</sup> at the wobble position were found.

*P. horikoshii*-ArcTGT

```

10   20   30   40       50       60       70
beta1  beta2  beta3  beta4  alpha1  beta5  alpha2
P.horikoshii-ArcTGT KMLKFEIKARDGAGRIGKLEEVNGGKKIETTPAIMVVVNPKQMVVEPKELEKMGFEITITNSSYITYKDEELRR
A.pernix-ArcTGT . . . EIRDVDLAGRIGRIYTQHGVVETPAFPVVIDVYRQEVSDVEVRAAGFGQVIITNAYLLWKRFGWEA
C.maquilingensis-ArcTGT . . . FEVIEKDEIARIGKLYTRHGVIETTPLPFPVD.PRKQEIPLSIIKQYFGQVIITNAYLLWKRFGWEA
M.sedula-ArcTGT . . . IGDFEVKDEDLAGRIGILETKHGKEETPVFFPVINPLKQEVFLEELKAVGFNNITFSFILKNNILQG
P.aerophilum-ArcTGT . . . MSFEIIAKDLAGRVGKLYTKSGVITPTLPFPVD.PRKQEIPLSIIKQYFGQVIITNAYLLWKRFGWEA
P.arenaticum-ArcTGT . . . MAFEIIAKDLAGRVGKLYTKSGVITPTLPFPVD.PRKQEIPLSIIKQYFGQVIITNAYLLWKRFGWEA
P.calidifontis-ArcTGT DMGVFEIVAKDLAGRIGRLYTKSGVETPALFPVPD.PRKQEVPSEVLKRYFGQVIITNAYLLWKRFGWEA
P.islandicum-ArcTGT . . . MSFEIIVAKDLAGRIGLLYTKSGVETPALPFPVDP.RRQEVPLEVVEKYFFNQVITNAYFLYRLTGGKA
S.marinus-ArcTGT .MEYYDPRDYDLAGRIARLTRHGVIETPTYLFPVVNPLRQQPSIEKLYELGFNAFITNAYFLYRRNKGEI
S.acidocaldarius-ArcTGT .IGDFEIKDEDLAGRIGILETKHGKEETPAFPFPVINPKVEITIQDLSVGFESIITNAFLIKYY.IGK
S.islandicum-ArcTGT .MTVFEVKYEDLAGRIGILTRSGNIETPVPFPVINILKDEISIEIKNMGFKNFITSYFLYKNIKYIKD
T.neutrophilus-ArcTGT .MSFEIIVAKDLAGRVGLLHTKSGVIETPALFPVPDPRKQ.EVLEAVQRYFGQVIITNAYLLWKRFGWEA
V.distributa-ArcTGT .MSFEIILDKDLAGRIGRLTRSGVETPALFPVPVINPKQVVPLSDIADIGFNQVIITNAYLLWKRFGWEA
T.pendens-ArcTGT WSEVFEIKEVDLLGRIGSISTRRGNVETPTLTPVINPSKPVLEPREIQMGFNLIMTNSYILKRQYGDLA

```

*P. horikoshii*-ArcTGT

```

80   90   100   110   120   130
alpha3 beta6 alpha4 alpha5 beta7 TT
P.horikoshii-ArcTGT KALELGIHRMLDYNGITEVDSGFOLMKYGSTEVSNREIIEFQHRIIGVDITGFLDITPPPDA. . . . P
A.pernix-ArcTGT AEK.GVHRILGFPGVVMTDSGAYQLLEYGETELVSQGEVVEYQKRLGSDIAVILDITPTGD. . . . .G
C.maquilingensis-ArcTGT AAREVGLHEIIGWDGPLMTDSGAYQLLEYGETELVSPDEALRYQVEIGSDIAVILDITPTSYPR. . . . .P
M.sedula-ArcTGT TI. . . . .HEKFGDNFPVIMTDSGAYQLLEYGETELVSQTRNDIVSFEAKIRPDAVILDITPTGNTD. . . . .D
P.aerophilum-ArcTGT V. . . . .DIKKVLSWNAVLMTDSGAYQLLEYGETELVSDPDELLQFOARIGSDIGVILDITPFDYEE. . . . .P
P.arenaticum-ArcTGT V. . . . .DVKKLLGWDGIIMTDSGAYQLLEYGETELVSDPDELLVYQDKIGTDIGVILDITPFDYEE. . . . .P
P.calidifontis-ArcTGT V. . . . .NVKRLLKWDGVVMTDSGAYQLLEYGETELVSDPDELLYQHKIGSDIGVILDITPFDYEE. . . . .P
P.islandicum-ArcTGT V. . . . .DIKKLLGWRGVVMTDSGAYQLLEYGETELVSDPDELLYFOQKIGSDIGVILDITPFDYEE. . . . .P
S.marinus-ArcTGT R. . . . .NIHEALGWNHVIMTDSGAYQLLEYGETELVSDPINDKTIVEYEKKIGVDIGVILDITPBTGRM. . . . .S
S.acidocaldarius-ArcTGT E. . . . .EDLHSILNYNKILIMTDSGAYQLLEYGETELVSDPNSVDIVNYETKLKPDAVILDITPTGLTE. . . . .D
S.islandicum-ArcTGT . . . . .DIHK. . . . .DMIIMTDSGAYQLLEYGETELVSDPINYQLKIKPDIGVILDITPBTGN. . . . .D
T.neutrophilus-ArcTGT V. . . . .DVKKMLGWGGVVMTDSGAYQLLEYGETELVSDPDELLRFQKIGSDIGVILDITPFDYEE. . . . .P
V.distributa-ArcTGT R. . . . .EVGVHKLLNWDKPIMTDSGAYQLLEYGETELVSDPDELLKYEIDIGTDIGVILDITPBTQWGRPKEAVVLE
T.pendens-ArcTGT KEV.KVHQLLGVDTPVMTDSGAYQLLEYGETELVSDPDELVRFQVEIGSDIGVILDITPBTKKGV. . . . .P

```

*P. horikoshii*-ArcTGT

```

140  150  160  170  180  190
alpha6 beta8 alpha7 beta9
P.horikoshii-ArcTGT REQAVKELEITLSRAREAE. . . . .EIK. . . . .EIPMNATIOGSTYTDLRRYAARRLSSM.NF.EIHPITG
A.pernix-ArcTGT RREAEESVRETIRRALEAR. . . . .VIEBGD. . . . .ERIWVYVPQGRYFDLVESARVGGRLGFY. . . . .RMYGITG
C.maquilingensis-ArcTGT RELVEVENTIRARRAI. . . . .LQLEDPEHRMLIVGPTOGGVYRDLLAYSARMVSELPF. . . . .DIYAITG
M.sedula-ArcTGT REEAKFSVEMTLERGKEIA. . . . .DIVQNE. . . . .DIWVHIOGGQLLVEYSAREANKRTNY. . . . .KMLALG
P.aerophilum-ArcTGT YSALLKVEETIRRAKRAS. . . . .AMLDKLE. . . . .DMLVVGPIGGGLVLLDLLARSAREISKLGF. . . . .HIFAVG
P.arenaticum-ArcTGT YSALLKVEETIRRAKRAA. . . . .ATLLDKL. . . . .SMLVVGPIGGGLVLLDLLARSAREISRLGF. . . . .PILAITG
P.calidifontis-ArcTGT YHSALLKVEETLRRARRAT. . . . .RLLKDL. . . . .DMLVVAPIOGGATYLLDLRRSARELSQMGF. . . . .PIYAVG
P.islandicum-ArcTGT YSALLKVEETIRRAKRAA. . . . .AVLKDL. . . . .DMLVVAPIOGGALYTLDLLRSAKELSKLGF. . . . .HIYAITG
S.marinus-ArcTGT WGEAREAVFEYKRAVEAL. . . . .PLIMDS. . . . .DQLWVLPIOGSPKDLLIYSSIKAWTLPY. . . . .HIHALG
S.acidocaldarius-ArcTGT KKEAKESVESTISRAKEAS. . . . .KFVELSKD. . . . .EIWVHPIOGGMYLDLLIEBYSARIADMQNY. . . . .KMLALG
S.islandicum-ArcTGT YENAKITYVETLKRIEAS. . . . .KIIVKQDN. . . . .NIWVYPIGGGKVLDLVKTSABESKFP. . . . .EDINYMVAITG
T.neutrophilus-ArcTGT YSALLKVEETIRRAKRAAYLKEM. . . . .RMLVVAPIOGGALYDLDLLARSARELSRLGF. . . . .HIFAVG
V.distributa-ArcTGT VEETLRRARAALTKARIWD. . . . .PEH. . . . .RMLIVGPIGGGDKLDLSYSATKMSELNF. . . . .DIYAITG
T.pendens-ArcTGT RGQVLAEVETTLRRAEASL. . . . .AVE. . . . .RDGMLLVGPIGGGLVTLDIVATAARRLGEMPF. . . . .DVYAVG

```

*P. horikoshii*-ArcTGT

```

200  210  220  230  240  250  260
alpha8 alpha9 beta10 eta1 alpha10 beta11 alpha11 beta12
P.horikoshii-ArcTGT GVVPLLESYRFRDVVDIVISSKMALRPDRPVPHFFGAGHIVFALAVAMGVDIFDSASYALYAKDDRYMTFP
A.pernix-ArcTGT SPTVFLERYMYHVVAVYRAKKHLPWGRVPHFFGAGHLIFFPYAVALVGVDIFDSASYILYAREGRYITE
C.maquilingensis-ArcTGT SPTTLLQANFTGIKMLITVKSIIPPKPHFGVGHLLPLAVALGVDIFDSASYVMLYAMDDRILS
M.sedula-ArcTGT SPTVFMEKKYDTLVDMIYTAKSSVSRGVPHFFGCVPHIIPFAVALGVDIFDSASYAIFARDNRYLTS
P.aerophilum-ArcTGT SPTTLLEBYRFDLLLEVILHVKNILREAPLHFFGAGHLVLFPAVALGVDIFDSASYILYARDNRIMLR
P.arenaticum-ArcTGT SPTTLLEBYRFDLLLEAVLVHVKNIAREAPLHFFGAGHLLFPAVALGVDIFDSASYILYARDNRIMLR
P.calidifontis-ArcTGT SPTTLLEBYRFDTLLEIVLBAKMAVRDAPLHFFGAGHLLLFPAVALGVDIFDSASYILYARDNRIMLR
P.islandicum-ArcTGT SPTTLLEBYRKFDLLKIVLVDVKLNMREAPLHFFGAGHLVLFPAVALGVDIFDSASYILYARDNRIMLR
S.marinus-ArcTGT SPTVLLEKYDYEKIVELTAIARLNPHPKPLHVFGVGHEMIIPFLVALGADIFDSASYILYARDNRYMTE
S.acidocaldarius-ArcTGT SPTVLMQRYEYAPLDMIYKSNSVSRGKFPPHFGGGHHIFAVAVALGVDIFDSASYILYARDHRYMTE
S.islandicum-ArcTGT SPTVLLERYMYDTVIDMIYTAKSNIKRGIPKPLHVFGVGHEMIIPFLVALGADIFDSASYILYARDNRYITR
T.neutrophilus-ArcTGT SPTTLLEBYRFDLLRRVVLVEVKNIAREAPLHFFGAGHLVLFPAVALGVDIFDSASYILYARDDRILR
V.distributa-ArcTGT SPTTLLEBYREFSTLRMIAVVKELPPGKPVHFGAGHLLFPAVAMGDIFDSASYVLYARDDRLILR
T.pendens-ArcTGT GPTQLMEBYDFSELVLKLVMTARLNLPWEAPLHFFGAGHEVMLPLAVAMGVDIFDSASYVLYARDDRYFTS

```

*P. horikoshii*-ArcTGT

```

270  280  290  300  310  320
beta13 eta2 alpha12 alpha13
P.horikoshii-ArcTGT . . . GTKRLDEL. . . . .DYFPCSCPVCSKYTPQBLREMPKE. . . . .ERTRLLABHNLVWIKEEIKRVKQAIKEG
A.pernix-ArcTGT . . . GVYRIEDL. . . . .DYLPCSCPVCSRYTPQBLREMDRV. . . . .ERTRLLABHNLVIVSASMRRVKQAIKEG
C.maquilingensis-ArcTGT . . . RTVRLSEL. . . . .DKDYVLD.GCGK.RAGELMEMSKE. . . . .ERTRLLABHNLWTLSREMBEIKRQAIKEG
M.sedula-ArcTGT . . . RTVRLEDL. . . . .EYFPCSCPVCSRYTPSELLEMKSE. . . . .ERYKLLABHNLWKIREELNRVKQAIKEG
P.aerophilum-ArcTGT . . . RTLRLEDVKTDYLPCSTKL. . . . .CHKPLVKELREMPHEERIQLIABHNLAILREELLEIKRQAIKEG
P.arenaticum-ArcTGT . . . RTLRLDDVKTEHLPCSTKL. . . . .CYKTPVKELREM. . . . .TQELLLIABHNLAVLREELLEIRQRIHEG
P.calidifontis-ArcTGT . . . RTLRLDDAKSEYLPCSTKLCTPV.KELREMPRE. . . . .ERTLLIABHNLAVLREELLEBEIRQRIHEG
P.islandicum-ArcTGT DRT. . . . .LRLDDVKT. . . . .EYLPCSTKLCTPV.KELREMPKQ. . . . .ERMMLIABHNLAVLREELLEBEIKRQAIKEG
S.marinus-ArcTGT . . . GTKRLEEL. . . . .QYLPCNCPVCSRYSVKELLEMPRY. . . . .KRIELLABHNLYMLKELLNTKQAIKEG
S.acidocaldarius-ArcTGT . . . RVYRLEEL. . . . .DYFPCSCPVCSRYSPKVEMPEE. . . . .QVVRLEABHNLVIKEINYIKQSLEG
S.islandicum-ArcTGT . . . RVYKLED. . . . .EYFPCSCPVCSKYTPKDLLEMNE. . . . .ERTRLLABHNLYTILEFKATKQIKEG
T.neutrophilus-ArcTGT . . . DRTLLRLDDDVKT. . . . .DYLPCSTKLCTPV.KELREMPKQ. . . . .ERTLLIABHNLAVLREELLEBEIRQRIHEG
V.distributa-ArcTGT . . . RTVRLSEVKVDKIPCNCPVCSKYTVKELLSMNKA. . . . .ERERLLIABHNLVLVWEEIQBEIKARIHEG
T.pendens-ArcTGT . . . R. . . . .GTLRLGEV. . . . .EELPCNCPVCSKYSARELRELPKQ. . . . .ERVVLLARNLYVIQKELKEIREAIHEG

```



**Supplemental Figure 6. Differences in the substrate binding pocket between the canonical (euryarchaeal) arcTGT and crenarcheal arcTGT.** a) Structure based multisequence alignment of the crenarcheal arcTGT and the canonical arcTGT in the catalytic domain. Of the canonical arcTGTs, only the *Pyrococcus horikoshii* sequence is shown. Secondary structure elements from *P. horikoshii* arcTGT crystal structure (PDB ID 1IQ8, (10)) are shown on top. Blue arrows indicate substrate recognition determinants in the canonical arcTGT that are conserved in crenarcheal arcTGT. Double arrows indicate substrate binding determinants that are absent in crenarcheal sequences. The recognition features for the preQ<sub>0</sub> cyano group are not conserved in crenarcheal arcTGT. These include Met102 (Leu in all crenarcheal arcTGT), and Val198 (Thr in crenarcheal arcTGT) located in the preQ<sub>0</sub> selection helix that harbors the major antideterminants against recognition of preQ<sub>1</sub>.

## 5. Supplemental References

1. Sambrook, J. E., Fritsch, F., and Maniatis, T. (1989) *Molecular cloning : A laboratory manual, 2nd edn.*, Cold Spring Harbor Laboratory Press, Cold Spring Harbor.
2. Burns, D. G., Janssen, P. H., Itoh, T., Kamekura, M., Li, Z., Jensen, G., Rodriguez-Valera, F., Bolhuis, H., and Dyall-Smith, M. L. (2007) *Haloquadratum walsbyi* gen. nov., sp. nov., the square haloarchaeon of Walsby, isolated from saltern crystallizers in Australia and Spain, *Int J Syst Evol Microbiol* 57, 387-392.
3. Dyall-Smith, M. L. (2009) The Halohandbook: Protocols for haloarchaeal genetics.
4. Allers, T., Ngo, H., Mevarech, M., and Lloyd, R. G. (2004) Development of additional selectable markers for the halophilic archaeon *Haloferax volcanii* based on the *leuB* and *trpA* genes, *Appl. Environ. Microbiol.* 70, 943-953.
5. Rinehart, J., Krett, B., Rubio, M. A. T., Alfonzo, J. D., and Söll, D. (2005) *Saccharomyces cerevisiae* imports the cytosolic pathway for Gln-tRNA synthesis into the mitochondrion, *Genes Dev.* 19, 583-592.
6. Miller, J. H. (1972) *Experiments in Molecular Genetics*, Cold Spring Harbor Laboratory Press, Cold Spring Harbor, NY.
7. Baba, T., Ara, T., Hasegawa, M., Takai, Y., Okumura, Y., Baba, M., Datsenko, K. A., Tomita, M., Wanner, B. L., and Mori, H. (2006) Construction of *Escherichia coli* K-12 in-frame, single-gene knockout mutants: the Keio collection, *Mol. Syst. Biol.* 2, 2006.0008.
8. Datsenko, K. A., and Wanner, B. L. (2000) One-step inactivation of chromosomal genes in *Escherichia coli* K-12 using PCR products, *Proc. Natl. Acad. Sci. U. S. A.* 97, 6640-6645.
9. Guzman, L. M., Belin, D., Carson, M. J., and Beckwith, J. (1995) Tight regulation, modulation, and high-level expression by vectors containing the arabinose P<sub>BAD</sub> promoter, *J. Bacteriol.* 177, 4121-4130.
10. Ishitani, R., Nureki, O., Fukai, S., Kijimoto, T., Nameki, N., Watanabe, M., Kondo, H., Sekine, M., Okada, N., Nishimura, S., and Yokoyama, S. (2002) Crystal structure of archaeosine tRNA-guanine transglycosylase, *J. Mol. Biol.* 318, 665-677.
